# Supplementary material
Source: publisher figshare collection journal article supplement (https://gsapubs.figshare.com/ndownloader/files/26117039)
Supplement: Supplementary file 1 [file 26117039]

## Sheet: Sheet1
TABLE S4. DETRITAL ZIRCON U-PB DATA
			Isotopic ratios										Ages (Ma)
Sample/number	U ppm	Th ppm	207Pb/235U	2s	206Pb/238U	2s	rho	238U/206Pb	2s	207Pb/206Pb	2s	rho	207Pb/235U	2s	238U/206Pb	2s	207Pb/206Pb	2s	disc.	Best Age	2s
MDZ1
MDZ1-64	274	199	0.291	0.0133369	0.0412	0.00153915	0.92442	24.2718	0.906746	0.05143	0.00122214	0.433773	259.2	9.1	260.2	8.1	259	30	1.00386	260.2	8.1
MDZ1-58	373	107	0.301	0.0161629	0.0413	0.00171239	0.98876	24.2131	1.00393	0.05142	0.00106076	0.328809	267	11	261.2	9.6	260	11	0.978277	261.2	9.6
MDZ1-24	201.3	140.9	0.3109	0.0106936	0.04144	0.00115192	0.61916	24.1313	0.670782	0.0539	0.0016131	0.531933	274.8	6.7	261.7	4.9	365	49	0.952329	261.7	4.9
MDZ1-2-93	251	221	0.298	0.0125109	0.0416	0.00154345	0.91098	24.0385	0.891876	0.05221	0.0012974	-0.11475	264.8	8.5	262.6	8	299	36	0.991692	262.6	8
MDZ1-2-43	312.1	590	0.2966	0.00843734	0.04167	0.00120476	0.9218	23.9981	0.693833	0.05188	0.001135	0.12255	263.7	4.7	263.1	5.4	279	20	0.997725	263.1	5.4
MDZ1-2-87	182.8	124.6	0.3113	0.0114422	0.0417	0.00138042	0.8806	23.9808	0.793851	0.05427	0.00127031	0.036159	275	7.5	263.5	6.9	381	27	0.958182	263.5	6.9
MDZ1-2-23	204.4	185	0.3033	0.00867389	0.04189	0.00106654	0.82541	23.8721	0.607794	0.0518	0.00118731	-0.099977	268.9	4.9	264.5	4.1	275	26	0.983637	264.5	4.1
MDZ1-2-51	311.8	235.3	0.3025	0.011011	0.0419	0.00138284	0.91498	23.8664	0.787669	0.05251	0.00119491	-0.16162	268.2	7.2	264.6	6.8	306	25	0.986577	264.6	6.8
MDZ1-2-4	254.1	317.3	0.2987	0.0110534	0.0419	0.00138284	0.93075	23.8664	0.787669	0.05117	0.00118632	-0.056618	265.2	7.3	264.6	7.1	247	27	0.997738	264.6	7.1
MDZ1-2-22	341	470	0.3044	0.00989463	0.04192	0.00127456	0.90407	23.855	0.725303	0.05221	0.00118964	-0.12327	269.7	6.1	264.7	6	293	25	0.981461	264.7	6
MDZ1-2-8	161.6	130.9	0.306	0.0125879	0.0421	0.00130727	0.81209	23.753	0.737568	0.05152	0.00138135	-0.099584	270.5	8.5	265.8	6.4	261	41	0.982625	265.8	6.4
MDZ1-48	192	123.6	0.316	0.0190773	0.0421	0.00244928	0.93995	23.753	1.38189	0.05392	0.00127489	0.491033	279	14	266	14	367	29	0.953405	266	14
MDZ1-2-53	220.2	254	0.3054	0.01063	0.0422	0.00146708	0.91219	23.6967	0.823816	0.05215	0.00125058	0.067875	270.4	6.8	266.2	7.7	290	30	0.984467	266.2	7.7
MDZ1-55	251.3	194.9	0.3116	0.0111121	0.0422	0.00146708	0.93457	23.6967	0.823816	0.05308	0.00119105	0.381924	275.3	7.2	266.4	7.1	332	23	0.967672	266.4	7.1
MDZ1-2-29	386.2	411	0.3078	0.0101738	0.04219	0.00127812	0.93919	23.7023	0.718048	0.05194	0.00118491	-0.23152	272.3	6.2	266.4	5.9	286	24	0.978333	266.4	5.9
MDZ1-36	237	250.1	0.2974	0.00816938	0.04222	0.00116319	0.8543	23.6855	0.652551	0.05079	0.0011151	0.455065	264.3	4.4	266.6	5	231	21	1.0087	266.6	5
MDZ1-2-38	400	166.1	0.3023	0.0107594	0.0422	0.00130856	0.93735	23.6967	0.734801	0.05222	0.00132169	0.015184	268.1	7	266.7	6.3	301	33	0.994778	266.7	6.3
MDZ1-2-61	158.5	113	0.3021	0.00955331	0.0423	0.00146824	0.8551	23.6407	0.820569	0.05269	0.00128767	0.22538	267.9	5.8	266.7	7.2	313	32	0.995521	266.7	7.2
MDZ1-2-17	164.1	110.6	0.3015	0.00886628	0.04225	0.00119148	0.83001	23.6686	0.667473	0.05171	0.00120581	0.19975	267.5	5.1	266.8	5.2	271	28	0.997383	266.8	5.2
MDZ1-80	174	144	0.294	0.0133632	0.0423	0.00180989	0.94494	23.6407	1.01152	0.05052	0.00113636	0.467277	261.3	9.3	267	10	218	24	1.02181	267	10
MDZ1-2-47	149.7	103.7	0.3019	0.00932027	0.04237	0.0012289	0.86996	23.6016	0.684539	0.05143	0.0012062	0.1101	267.8	5.5	267.5	5.5	258	28	0.99888	267.5	5.5
MDZ1-2-74	120.4	83	0.301	0.0116722	0.04237	0.00129556	0.81974	23.6016	0.721676	0.05121	0.00141063	-0.024155	266.9	8	267.5	6.1	256	46	1.00225	267.5	6.1
MDZ1-2-42	120.3	87.1	0.294	0.0116006	0.0424	0.00172311	0.9198	23.5849	0.958476	0.05043	0.00120535	0.11886	261.3	7.9	267.5	9	213	31	1.02373	267.5	9
MDZ1-8	164.8	150	0.31	0.012627	0.0424	0.00172311	0.85606	23.5849	0.958476	0.0522	0.00151655	0.361477	274.5	8.5	267.6	9.4	291	49	0.974863	267.6	9.4
MDZ1-26	362.7	373.7	0.3128	0.00880781	0.04241	0.00111908	0.58036	23.5793	0.622193	0.05352	0.001307	0.405721	276.3	4.8	267.8	4.5	350	32	0.969236	267.8	4.5
MDZ1-5	157.3	129.9	0.2984	0.00904749	0.04242	0.00106878	0.3214	23.5738	0.593944	0.0512	0.00173452	0.45243	265.2	5.3	267.8	4	266	53	1.0098	267.8	4
MDZ1-2-92	118.3	119.9	0.3042	0.0115349	0.04241	0.00125134	0.8384	23.5793	0.695725	0.05175	0.00135854	-0.054835	269.5	7.6	267.8	5.7	279	37	0.993692	267.8	5.7
MDZ1-2-89	97.3	59.7	0.3089	0.00979427	0.04245	0.00123	0.71629	23.5571	0.682574	0.05178	0.00136549	0.10082	273.2	5.9	268	5.5	290	44	0.980966	268	5.5
MDZ1-2-32	137.2	124	0.3001	0.00862925	0.04245	0.00120847	0.82402	23.5571	0.670626	0.05113	0.00125064	0.086051	266.4	4.9	268	5.3	251	34	1.00601	268	5.3
MDZ1-15	148	93.9	0.3074	0.011232	0.04249	0.00117399	0.14715	23.5349	0.650268	0.0518	0.00207685	0.407191	272.1	7.3	268.2	5	271	79	0.985667	268.2	5
MDZ1-67	320.1	349.1	0.3021	0.00939924	0.04252	0.00118135	0.91435	23.5183	0.653418	0.05087	0.00116619	0.405521	268	5.7	268.4	5.1	234	26	1.00149	268.4	5.1
MDZ1-2-33	216.8	204	0.3138	0.0116374	0.0425	0.00131244	0.87359	23.5294	0.726611	0.05292	0.00138286	-0.023174	276.9	7.6	268.4	6.3	323	38	0.969303	268.4	6.3
MDZ1-65	229.1	179.3	0.3	0.0112361	0.0426	0.00155432	0.90031	23.4742	0.856487	0.05047	0.00120058	0.489922	266.3	7.4	268.6	8.1	226	24	1.00864	268.6	8.1
MDZ1-2-14	153.1	74.2	0.305	0.0117137	0.0426	0.00131374	0.85836	23.4742	0.723918	0.05176	0.0014255	-0.20399	269.7	8.1	268.6	6.3	271	44	0.995921	268.6	6.3
MDZ1-2-70	215.2	161.7	0.305	0.0125782	0.0426	0.00181271	0.93042	23.4742	0.998868	0.05193	0.00120958	0.15192	270.2	8.8	268.8	9.6	281	27	0.994819	268.8	9.6
MDZ1-4	178	251	0.31	0.0117661	0.0426	0.00155432	0.83381	23.4742	0.856487	0.0521	0.00151518	0.490611	273.8	8.1	268.9	7.9	304	56	0.982104	268.9	7.9
MDZ1-2-68	224	149.3	0.31	0.012627	0.0426	0.00155432	0.93747	23.4742	0.856487	0.05275	0.00119914	-0.26716	274	8.2	268.9	7.9	317	24	0.981387	268.9	7.9
MDZ1-2-45	237	205	0.3	0.01253	0.0426	0.00155432	0.92177	23.4742	0.856487	0.05141	0.00123826	-0.043537	265.9	8.4	269.2	7.9	257	31	1.01241	269.2	7.9
MDZ1-44	243.1	138.7	0.3023	0.00971155	0.04266	0.00124742	0.79828	23.4412	0.685441	0.051	0.00128406	0.48998	268.1	5.9	269.3	5.6	240	36	1.00448	269.3	5.6
MDZ1-2-37	128.9	93.8	0.3045	0.0109498	0.0427	0.00155542	0.85596	23.4192	0.853081	0.0522	0.00144566	0.0568	269.7	7	269.3	7.8	301	42	0.998517	269.3	7.8
MDZ1-2-44	194.9	173	0.3013	0.0109143	0.0427	0.00147286	0.96641	23.4192	0.807803	0.05105	0.00116449	-0.14925	267.3	7.1	269.5	7.3	242	25	1.00823	269.5	7.3
MDZ1-2-58	197.1	170.3	0.3102	0.00950419	0.0427	0.00117704	0.68099	23.4192	0.645557	0.0521	0.00143044	0.14771	274.2	5.5	269.6	5	294	45	0.983224	269.6	5
MDZ1-34	157.8	100.8	0.3032	0.0110187	0.0427	0.00139259	0.76768	23.4192	0.76378	0.0513	0.00157882	0.485075	268.8	7.2	269.8	6.7	253	53	1.00372	269.8	6.7
MDZ1-2-27	153.4	118.1	0.3073	0.00954271	0.04274	0.00127054	0.64328	23.3973	0.695538	0.05194	0.00130507	0.3253	272	5.7	269.8	5.8	280	35	0.991912	269.8	5.8
MDZ1-2-71	105.1	80.5	0.3253	0.0114319	0.0428	0.00147402	0.83877	23.3645	0.804667	0.055	0.00146	0.011037	285.8	7.2	269.9	7.4	409	39	0.944367	269.9	7.4
MDZ1-2-18	442.7	552.9	0.3082	0.0088139	0.04276	0.00116425	0.90695	23.3863	0.63675	0.05193	0.0011319	0.024306	273.9	5.3	269.9	4.9	281	20	0.985396	269.9	4.9
MDZ1-2-40	203	226	0.331	0.0173154	0.0428	0.00199317	0.97452	23.3645	1.08807	0.056	0.00156984	-0.43761	290	12	270	11	452	45	0.931034	270	11
MDZ1-2-62	107.7	52.91	0.304	0.00934753	0.04278	0.00110546	0.69519	23.3754	0.604036	0.0514	0.00143415	-0.056924	270.7	5.9	270	4.4	252	46	0.997414	270	4.4
MDZ1-77	172.4	114.5	0.3115	0.0116126	0.0428	0.00147402	0.89416	23.3645	0.804667	0.05306	0.0013786	0.437372	275.3	7.6	270.1	7.2	330	38	0.981112	270.1	7.2
MDZ1-2-15	168.4	122	0.307	0.0104048	0.0428	0.00131633	0.84012	23.3645	0.718586	0.05174	0.00127217	0.29329	271.7	6.5	270.1	6.4	272	33	0.994111	270.1	6.4
MDZ1-2-60	344	466.9	0.3018	0.00924301	0.04279	0.00130862	0.96764	23.3699	0.71471	0.05111	0.0010871	0.25261	267.7	5.4	270.1	6.1	245	17	1.00897	270.1	6.1
MDZ1-83	403	243	0.31	0.0106019	0.0429	0.00172805	0.95318	23.31	0.93895	0.05203	0.00111128	0.467574	276.8	8.2	270.7	9.3	287	17	0.977962	270.7	9.3
MDZ1-2-84	275.2	223.8	0.3068	0.0108927	0.0429	0.00128754	0.91264	23.31	0.699595	0.05223	0.00124643	-0.30401	271.5	7	270.7	5.9	294	30	0.997053	270.7	5.9
MDZ1-2-73	142.4	113.8	0.3102	0.00942866	0.0429	0.00124345	0.74343	23.31	0.675637	0.0519	0.00136731	0.048102	274.3	5.5	270.8	5.5	285	38	0.98724	270.8	5.5
MDZ1-2-66	148.9	103.1	0.302	0.0105911	0.0429	0.00147518	0.8635	23.31	0.801551	0.05122	0.0012186	-0.0095987	267.8	6.8	270.8	7.2	255	28	1.0112	270.8	7.2
MDZ1-2-5	227.4	129.7	0.3206	0.00979151	0.0429	0.00131764	0.84144	23.31	0.715947	0.05258	0.00124156	-0.0052053	282.3	5.7	270.9	6.3	309	29	0.959617	270.9	6.3
MDZ1-2-48	113	84.2	0.3046	0.0111177	0.0429	0.00147518	0.85005	23.31	0.801551	0.05111	0.00136857	-0.14934	271.6	6.6	271	7.3	251	43	0.997791	271	7.3
MDZ1-2-65	161.8	117.9	0.3064	0.010971	0.04294	0.00122247	0.86046	23.2883	0.663002	0.05222	0.00130352	-0.1486	271.2	7	271	5.4	293	34	0.999263	271	5.4
MDZ1-2-90	171.4	149.9	0.305	0.0111221	0.043	0.00147635	0.86267	23.2558	0.798457	0.05216	0.00129068	0.038963	270.1	7.2	271.1	7.4	290	33	1.0037	271.1	7.4
MDZ1-52	823	456	0.3121	0.00999012	0.043	0.00147635	0.97889	23.2558	0.798457	0.05189	0.00110866	0.42003	275.8	6.1	271.4	7.4	280	17	0.984046	271.4	7.4
MDZ1-2-56	194.9	125.3	0.3	0.0102416	0.043	0.00139628	0.86103	23.2558	0.755155	0.05106	0.00126113	0.044517	266.3	6.5	271.5	6.7	241	33	1.01953	271.5	6.7
MDZ1-2-36	123.6	78.4	0.308	0.011745	0.043	0.00155872	0.88741	23.2558	0.843006	0.05114	0.00128628	0.0023677	274.1	8.5	271.6	8	254	38	0.990879	271.6	8
MDZ1-3	168	140	0.311	0.0144114	0.0431	0.00181743	0.95882	23.2019	0.978369	0.05232	0.00117297	0.53164	274.5	9.8	271.7	9.6	299	23	0.9898	271.7	9.6
MDZ1-2-1	1317	943	0.3142	0.0102518	0.0431	0.00139751	0.95876	23.2019	0.752318	0.05242	0.00115726	-0.060501	277.4	6.3	271.7	6.6	303	21	0.979452	271.7	6.6
MDZ1-2-82	125.4	78.2	0.306	0.0143685	0.0431	0.00139751	0.86888	23.2019	0.752318	0.0516	0.00150832	-0.29529	272.6	9.4	271.9	7	261	49	0.997432	271.9	7
MDZ1-2-52	114.7	69.4	0.2979	0.00919227	0.0431	0.00147751	0.80897	23.2019	0.795384	0.05118	0.00125146	0.30259	264.6	5.5	271.9	7.7	247	33	1.02759	271.9	7.7
MDZ1-2-41	166.4	132.7	0.3113	0.0106983	0.0431	0.00139751	0.84329	23.2019	0.752318	0.05208	0.00138972	0.10687	275	6.7	272	6.8	305	34	0.989091	272	6.8
MDZ1-2-26	95.2	52.03	0.302	0.0116825	0.0431	0.00139751	0.77949	23.2019	0.752318	0.0512	0.00150286	0.04751	268	7.9	272.1	7	247	48	1.0153	272.1	7
MDZ1-2	181.8	182.7	0.3105	0.00966044	0.04314	0.00109239	0.72864	23.1803	0.586974	0.05212	0.00128417	0.461389	274.5	5.7	272.2	4.2	290	33	0.991621	272.2	4.2
MDZ1-2-64	104.2	60.42	0.31	0.012627	0.04315	0.00123971	0.66307	23.175	0.66582	0.0515	0.00165858	-0.088489	273.7	8.4	272.3	5.5	258	57	0.994885	272.3	5.5
MDZ1-2-49	121	81.9	0.3037	0.0104472	0.0432	0.00128413	0.72218	23.1482	0.688085	0.0507	0.00149606	0.11878	269.1	6.7	272.6	5.9	223	50	1.01301	272.6	5.9
MDZ1-2-69	119	81.8	0.308	0.0134887	0.0432	0.00147868	0.90795	23.1482	0.792331	0.05138	0.00135943	-0.31989	272.5	9.2	272.8	7.5	255	40	1.0011	272.8	7.5
MDZ1-2-28	105.4	85.5	0.3052	0.00998343	0.0432	0.00139875	0.80558	23.1482	0.749501	0.05052	0.00128876	0.24563	270.3	6.2	272.8	7	224	34	1.00925	272.8	7
MDZ1-14	106.8	85.3	0.319	0.0135906	0.0432	0.00132155	0.53331	23.1482	0.708135	0.0526	0.00208488	0.322627	281.2	9	272.9	6.3	305	76	0.970484	272.9	6.3
MDZ1-39	201.2	157.1	0.3066	0.0113071	0.04327	0.00125579	0.44665	23.1107	0.670725	0.051	0.00181395	0.139239	271.5	7.3	273.1	5.6	238	66	1.00589	273.1	5.6
MDZ1-51	209.3	181.5	0.3097	0.00949766	0.0433	0.00147985	0.80557	23.0947	0.7893	0.05117	0.00131139	0.366821	273.9	5.6	273.2	7.4	247	37	0.997444	273.2	7.4
MDZ1-2-24	107.4	76.9	0.314	0.0118084	0.04331	0.00130046	0.81371	23.0894	0.6933	0.05094	0.001393	-0.24514	276.7	7.9	273.3	6	244	46	0.987712	273.3	6
MDZ1-2-13	163	113	0.313	0.0126565	0.04335	0.00120025	0.81796	23.068	0.638693	0.05161	0.00138937	-0.13964	276.6	8.5	273.6	5.2	274	44	0.989154	273.6	5.2
MDZ1-2-25	163	102.6	0.313	0.0126565	0.0434	0.00156315	0.88007	23.0415	0.829889	0.0518	0.00151106	-0.2599	276.2	8.6	273.7	8.1	273	48	0.990949	273.7	8.1
MDZ1-18	823	424	0.3146	0.00848995	0.04342	0.00125786	0.94243	23.0309	0.667196	0.05239	0.00110471	0.517625	277.7	4.4	274	5.6	302	15	0.986676	274	5.6
MDZ1-37	140.5	81.7	0.3106	0.00981575	0.04342	0.00101736	0.34879	23.0309	0.539628	0.0517	0.00174045	0.355334	274.6	5.9	274	3.3	270	62	0.997815	274	3.3
MDZ1-76	219.4	151.6	0.309	0.0126171	0.0434	0.00190878	0.89073	23.0415	1.01339	0.05152	0.00137471	0.467234	273.3	8.9	274	10	263	40	1.00256	274	10
MDZ1-63	142.2	78	0.307	0.0134796	0.0434	0.00182028	0.91335	23.0415	0.966405	0.05126	0.00126437	0.34008	271.7	9.4	274	10	252	33	1.00847	274	10
MDZ1-2-88	662	637	0.315	0.0135532	0.0435	0.00182124	0.97644	22.9885	0.962471	0.05279	0.0011221	-0.18551	277.4	9.6	274.3	9.9	319	16	0.988825	274.3	9.9
MDZ1-2-83	145.4	139.1	0.3126	0.0114563	0.0435	0.00148219	0.76256	22.9885	0.783297	0.0523	0.00151793	0.076793	276.1	7.4	274.5	7.3	295	48	0.994205	274.5	7.3
MDZ1-32	111.1	73	0.321	0.0118835	0.0435	0.00132548	0.85656	22.9885	0.700479	0.054	0.00161443	0.402266	282.5	7.8	274.8	6.2	368	50	0.972743	274.8	6.2
MDZ1-35	130.4	128.9	0.319	0.0118619	0.04355	0.00109888	0.82886	22.9621	0.579395	0.0528	0.00152484	0.436037	280.7	7.8	274.8	4.2	317	47	0.978981	274.8	4.2
MDZ1-2-75	553	48.4	0.317	0.0103651	0.0436	0.00148337	0.93284	22.9358	0.780326	0.0527	0.00116658	0.20702	279.5	6.3	275	7.2	315	22	0.9839	275	7.2
MDZ1-2-30	138.4	86.1	0.3136	0.0116352	0.0436	0.00156537	0.82199	22.9358	0.823463	0.05164	0.00140327	0.32443	278.3	7.9	275.3	8	283	42	0.98922	275.3	8
MDZ1-2-76	116.1	68.9	0.3187	0.0107046	0.0437	0.00148455	0.88483	22.8833	0.777375	0.05296	0.00133952	0.22833	280.8	6.6	275.7	7.1	324	35	0.981838	275.7	7.1
MDZ1-2-12	151.9	170.2	0.337	0.0129007	0.04372	0.00124767	0.68514	22.8728	0.652738	0.0555	0.00170942	-0.098735	294.4	8.1	275.8	5.5	428	51	0.936821	275.8	5.5
MDZ1-2-78	125.3	80	0.318	0.0135812	0.0437	0.00156649	0.89614	22.8833	0.820283	0.05226	0.00132232	0.019112	280.2	9.2	275.9	7.8	294	35	0.984654	275.9	7.8
MDZ1-84	152	104	0.307	0.0218792	0.0437	0.00274297	0.97684	22.8833	1.43634	0.05168	0.00132561	0.474207	271	17	276	16	270	37	1.01845	276	16
MDZ1-2-55	257.5	257.4	0.306	0.0110496	0.0438	0.0015676	0.94273	22.8311	0.817123	0.0512	0.00113955	0.11423	270.9	7.1	276.1	8	249	23	1.0192	276.1	8
MDZ1-49	99.3	57.6	0.318	0.0153769	0.0439	0.00182507	0.83948	22.779	0.947002	0.0518	0.00158534	0.594629	280	11	277	10	275	54	0.989286	277	10
MDZ1-2-85	129.7	94	0.3178	0.00930799	0.0439	0.00125733	0.80991	22.779	0.65241	0.05265	0.00125893	0.077825	280.1	5.2	277	5.6	312	30	0.988933	277	5.6
MDZ1-2-81	136.3	120.4	0.314	0.0144374	0.0439	0.00191334	0.93989	22.779	0.992805	0.05187	0.00121893	-0.24145	277	10	277	10	285	31	1	277	10
MDZ1-2-7	264	82.4	0.3141	0.0100152	0.0439	0.00140744	0.90731	22.779	0.730299	0.05137	0.00121043	0.015938	277.2	6	277.1	6.8	262	27	0.999639	277.1	6.8
MDZ1-11	153.3	140.7	0.319	0.0135906	0.0439	0.00133075	0.63114	22.779	0.690504	0.0521	0.00190939	0.30897	280.8	9.2	277.2	6.4	307	61	0.987179	277.2	6.4
MDZ1-2-72	109.9	142	0.3182	0.0110227	0.044	0.00148809	0.89092	22.7273	0.768639	0.05206	0.00125463	-0.029746	280.3	6.9	277.3	7.4	286	31	0.989297	277.3	7.4
MDZ1-2-57	115.7	82.9	0.31	0.0117661	0.044	0.0016536	0.88992	22.7273	0.854133	0.05156	0.00136871	0.028557	274.3	8.1	277.6	8.8	262	41	1.01203	277.6	8.8
MDZ1-70	741	742	0.3138	0.0116374	0.044	0.00156984	0.98889	22.7273	0.810868	0.05131	0.00107494	0.511708	277.1	7.5	277.7	8.1	259	16	1.00217	277.7	8.1
MDZ1-45	363	301	0.319	0.0153852	0.0441	0.00200448	0.96935	22.6757	1.03068	0.05238	0.00114016	0.464671	281	10	278	11	302	19	0.989324	278	11
MDZ1-2-35	69.5	40.3	0.316	0.0118297	0.0441	0.00140994	0.79928	22.6757	0.724975	0.0529	0.0014558	0.089055	278.8	7.9	278	7	320	44	0.997131	278	7
MDZ1-2-79	112.8	91.1	0.313	0.0153358	0.0441	0.00218585	0.93683	22.6757	1.12394	0.05208	0.00136357	0.040845	276	11	278	13	286	39	1.00725	278	13
MDZ1-60	144	102.4	0.312	0.0199984	0.0442	0.00227848	0.97646	22.6244	1.16627	0.05147	0.00125051	0.502059	280	13	279	13	261	32	0.996429	279	13
MDZ1-9	298	328	0.322	0.0145077	0.0443	0.00182893	0.91905	22.5734	0.931945	0.05216	0.00123983	0.387813	283	10	279.2	9.8	292	29	0.986572	279.2	9.8
MDZ1-30	133	83	0.316	0.0135625	0.0443	0.00141244	0.40439	22.5734	0.71972	0.0518	0.00207685	0.504289	278.9	9.4	279.5	6.6	269	83	1.00215	279.5	6.6
MDZ1-25	285	439	0.3196	0.0115333	0.04432	0.00114831	0.50999	22.5632	0.584599	0.0516	0.00158273	0.244373	281.5	7.4	279.6	4.5	263	54	0.99325	279.6	4.5
MDZ1-2-59	110.7	81.6	0.3199	0.0107993	0.04435	0.00124947	0.67975	22.5479	0.63524	0.0521	0.00144422	0.22094	281.7	6.7	279.7	5.5	285	44	0.9929	279.7	5.5
MDZ1-87	188.9	154	0.328	0.0154607	0.0443	0.00191703	0.8952	22.5734	0.976834	0.05296	0.00139643	0.526863	288	11	280	11	326	39	0.972222	280	11
MDZ1-2-3	374	167.8	0.3223	0.0105882	0.0444	0.00133736	0.94181	22.5225	0.678397	0.05212	0.0011786	-0.10688	283.6	6.5	280	6.4	289	24	0.987306	280	6.4
MDZ1-50	144.7	80.7	0.322	0.0145077	0.0444	0.00133736	0.83302	22.5225	0.678397	0.05264	0.00129846	0.479565	283	9.9	280.2	6.2	313	33	0.990106	280.2	6.2
MDZ1-86	144.4	97.5	0.325	0.0154353	0.0444	0.0018299	0.81765	22.5225	0.928244	0.0534	0.00184136	0.444495	286	11	280.3	9.9	343	62	0.98007	280.3	9.9
MDZ1-2-46	180.6	192.1	0.338	0.0164529	0.0445	0.00165895	0.79225	22.4719	0.837745	0.0547	0.00185657	-0.050216	295	12	280.8	8.7	397	62	0.951864	280.8	8.7
MDZ1-2-54	96.6	53.37	0.3075	0.0114853	0.0446	0.00149521	0.77853	22.4215	0.751681	0.04988	0.00131061	-0.0015236	273.7	7.9	281.2	7.7	187	39	1.0274	281.2	7.7
MDZ1-74	105.9	60.1	0.331	0.0201202	0.0446	0.00141621	0.54827	22.4215	0.711966	0.0537	0.00281309	0.355179	290	14	281.3	6.8	350	110	0.97	281.3	6.8
MDZ1-2-50	135	92.2	0.3482	0.0106821	0.0446	0.00141621	0.84299	22.4215	0.711966	0.05606	0.00141304	0.18489	303.3	6.1	281.3	6.9	459	35	0.927465	281.3	6.9
MDZ1-85	135.3	70.1	0.312	0.0153277	0.0447	0.00157773	0.91769	22.3714	0.78962	0.05087	0.00130046	0.471422	275	11	281.9	7.9	234	38	1.02509	281.9	7.9
MDZ1-42	313	333	0.324	0.0297152	0.0449	0.00400205	0.99422	22.2717	1.98513	0.0521	0.00117361	0.491949	285	22	283	24	289	24	0.992982	283	24
MDZ1-27	262.9	394	0.323	0.0119051	0.0449	0.0014988	0.90971	22.2717	0.743449	0.05246	0.00131336	0.513905	284.5	8	283	7.6	304	34	0.994728	283	7.6
MDZ1-57	126	83	0.323	0.0219712	0.0448	0.00303526	0.9745	22.3214	1.51231	0.0518	0.00151106	0.460718	284	16	283	18	275	49	0.996479	283	18
MDZ1-71	118.5	66.2	0.318	0.0162926	0.045	0.00183576	0.89855	22.2222	0.906546	0.0513	0.00150422	0.469907	280	12	283.6	9.8	253	48	1.01286	283.6	9.8
MDZ1-16	154.6	129.8	0.325	0.00779359	0.04515	0.00101799	0.39818	22.1484	0.499378	0.05169	0.00116174	0.433363	285.8	3.3	284.7	2.9	271	24	0.996151	284.7	2.9
MDZ1-10	615	268	0.3287	0.00960299	0.0452	0.0015024	0.93166	22.1239	0.735376	0.0518	0.00121774	0.4948	288.5	5.4	285.1	7.2	276	28	0.988215	285.1	7.2
MDZ1-47	150	113	0.33	0.0336535	0.0454	0.00351916	0.98334	22.0264	1.70737	0.05321	0.00145349	0.465536	288	25	286	21	336	42	0.993056	286	21
MDZ1-2-31	180.9	172	0.329	0.0114742	0.0454	0.00150481	0.93563	22.0264	0.730081	0.05193	0.00115706	0.12574	288.6	7.2	286.2	7.6	286	21	0.991684	286.2	7.6
MDZ1-69	131.9	95.5	0.316	0.0144548	0.0456	0.00175549	0.95334	21.9298	0.844245	0.0514	0.00129042	0.437638	282.3	8.4	287.1	9	258	35	1.017	287.1	9
MDZ1-2-86	112	78.1	0.3239	0.0104501	0.0457	0.00143017	0.79352	21.8818	0.684788	0.0522	0.00151655	0.29856	284.8	6.4	288.2	6.9	300	46	1.01194	288.2	6.9
MDZ1-78	122.9	75.4	0.337	0.0129007	0.0458	0.00175757	0.82245	21.8341	0.83788	0.05328	0.00136934	0.575583	294.8	8.5	288.6	9.1	339	37	0.978969	288.6	9.1
MDZ1-62	178	119	0.326	0.0182074	0.0461	0.00229349	0.97261	21.692	1.07918	0.05084	0.00120681	0.425987	287	13	291	13	233	30	1.01394	291	13
MDZ1-68	97.9	66.3	0.328	0.0258463	0.0462	0.00313907	0.96689	21.645	1.47068	0.05131	0.00135838	0.569922	287	19	291	19	253	40	1.01394	291	19
MDZ1-53	86.1	50.2	0.337	0.0120593	0.0466	0.0022065	0.87242	21.4592	1.01609	0.0517	0.00166107	0.560411	294.9	7.5	293	12	270	57	0.993557	293	12
MDZ1-19	1040	1110	0.34	0.0129321	0.0471	0.00168741	0.94576	21.2314	0.760641	0.05219	0.00117065	0.481113	296.9	8	296.7	8.4	293	23	0.999326	296.7	8.4
MDZ1-2-80	78.6	32.5	0.333	0.0164121	0.0476	0.0018618	0.9209	21.0084	0.821712	0.0514	0.00143415	-0.24229	291	11	299.4	9.9	256	44	1.02887	299.4	9.9
MDZ1-75	276	183	0.332	0.0173231	0.0479	0.00249154	0.96059	20.8768	1.08592	0.05085	0.00119632	0.512945	291	12	302	14	233	29	1.0378	302	14
MDZ1-2-19	100.6	139.3	0.3673	0.0113866	0.04887	0.00130851	0.39208	20.4625	0.547891	0.0541	0.00169137	0.30286	317.5	6.5	307.6	5.3	369	53	0.968819	307.6	5.3
MDZ1-20	95	106.6	0.382	0.0223466	0.0492	0.00179395	0.74768	20.3252	0.741106	0.0561	0.00255908	0.448609	328	16	309.9	9.1	448	90	0.944817	309.9	9.1
MDZ1-46	360	305.9	0.376	0.0204341	0.0501	0.0023268	0.96572	19.9601	0.927009	0.05384	0.00126297	0.506311	324	14	315	13	364	27	0.972222	315	13
MDZ1-12	76.5	65.6	0.41	0.0153701	0.05252	0.00144341	0.42634	19.0404	0.523288	0.0553	0.00228544	0.506761	348.7	9.2	330	6.1	447	69	0.946372	330	6.1
MDZ1-28	117.4	158.3	0.397	0.0178618	0.0537	0.00184485	0.87497	18.622	0.639754	0.0548	0.00177798	0.302737	339	12	337	9	401	57	0.9941	337	9
MDZ1-81	546	107.3	1.767	0.0620477	0.1673	0.00560765	0.97407	5.97729	0.20035	0.07604	0.00158598	0.305075	1033	19	997	25	1096	12	0.96515	997	25
MDZ1-7	983	416	2.072	0.0822087	0.1814	0.00878421	0.99257	5.51268	0.266949	0.0823	0.00203699	0.23484	1139	24	1087	39	1252	28	0.954346	1087	39
MDZ1-40	51.3	28.2	2.176	0.0670447	0.1979	0.00661481	0.85728	5.05306	0.168899	0.0783	0.00197291	0.455749	1173	17	1164	29	1164	25	0.992327	1164	29
MDZ1-61	185.6	18.7	3.07	0.117345	0.2423	0.00961112	0.99181	4.12711	0.163707	0.09096	0.00189483	0.371176	1424	26	1398	43	1446	11	0.966805	1446	11
MDZ1-17	400	160	3.57	0.131141	0.2691	0.00980846	0.98488	3.71609	0.135448	0.09565	0.00199328	0.456256	1542	25	1536	42	1541	11	0.996755	1541	11
MDZ1-2-39	264.8	151.6	4.76	0.1352	0.3119	0.00872483	0.96864	3.20616	0.0896863	0.11041	0.00237709	0.31406	1777	17	1749	30	1806	15	0.968439	1766	34
discarded grains
MDZ1-2-77	779	840	0.284	0.0115005	0.0377	0.00141722	0.97626	26.5252	0.997137	0.05471	0.00119485	-0.40115	255.6	7.7	240.1	7.1	400	19	0.939358	240.1	7.1
MDZ1-72	481	236	0.286	0.018887	0.0399	0.00271971	0.98862	25.0627	1.70835	0.05159	0.00112566	0.5094	255	14	252	16	267	20	0.988235	252	16
MDZ1-56	154	113	0.303	0.0266969	0.0422	0.00379504	0.98652	23.6967	2.13104	0.05111	0.00118528	0.419818	268	21	267	23	245	27	0.996269	267	23
MDZ1-43	537	263	0.329	0.0346309	0.0449	0.0044907	0.99049	22.2717	2.22752	0.05278	0.00135528	0.49239	288	26	283	27	318	37	0.982639	283	27
MDZ1-59	325	255	0.318	0.0434678	0.0449	0.0062647	0.99478	22.2717	3.10747	0.05055	0.00111491	0.474839	279	33	283	38	220	21	1.01434	283	38
MDZ1-91	151.5	102.5	3.53	0.156794	0.2485	0.010633	0.99009	4.02414	0.172188	0.10371	0.00213361	-0.20409	1530	31	1429	48	1691.3	8.9	0.844912	1484	51
MDZ1-33	136.7	108.1	0.69	0.110862	0.0487	0.00178848	0.42636	20.5339	0.754097	0.102	0.0141478	0.153955	529	63	306.8	9.2	1700	290	0.579962	306.8	9.2
MDZ1-54	262	208	0.41	0.0311005	0.0479	0.00295935	0.73047	20.8768	1.28981	0.0629	0.00362527	0.519596	348	21	302	17	690	110	0.867816	302	17
MDZ1-13	910	382	0.263	0.0197147	0.0366	0.00203613	0.97529	27.3224	1.52	0.0514	0.00173689	0.457465	237	15	232	12	257	64	0.978903	231.548	12.7442
MDZ2
MDZ2-16	192	103.1	0.305	0.0117137	0.03949	0.00111709	0.80667	25.3229	0.71633	0.056	0.00164146	0.507479	270	8	249.7	4.9	449	48	0.924815	249.7	4.9
MDZ2-126	100	53	0.288	0.0133108	0.0412	0.00145567	0.73605	24.2718	0.857568	0.0512	0.00157752	0.42963	256.9	9.4	260.5	7.6	245	55	1.01277	260.5	7.6
MDZ2-111	268	97.3	0.2982	0.0113017	0.0417	0.00130214	0.90353	23.9808	0.748831	0.05201	0.00128239	0.465238	264.9	7.5	263.1	6.2	285	33	0.993843	263.1	6.2
MDZ2-112	216	130.7	0.2908	0.0102169	0.0417	0.00138042	0.93974	23.9808	0.793851	0.05147	0.00120169	0.464753	259.1	6.6	263.2	7.1	261	28	1.0161	263.2	7.1
MDZ2-61	471	616	0.3014	0.00717961	0.04196	0.000878554	0.76161	23.8322	0.498996	0.05158	0.00112152	0.497462	267.5	3.1	265	1.6	266	19	0.99057	265	1.6
MDZ2-116	249.6	202.4	0.293	0.0115905	0.042	0.00138405	0.92915	23.8095	0.78461	0.05021	0.00121841	0.405479	260.7	8.1	265.1	6.7	204	32	1.01648	265.1	6.7
MDZ2-104	395	258.6	0.2957	0.0115319	0.042	0.00163267	0.9559	23.8095	0.925548	0.05107	0.00113285	0.405755	262.9	7.8	265.3	8.7	244	22	1.0083	265.3	8.7
MDZ2-124	591.1	147.1	0.295	0.00773369	0.0421	0.00120356	0.93426	23.753	0.679055	0.05116	0.00108804	0.432504	262.5	3.9	265.8	5.3	248	17	1.01276	265.8	5.3
MDZ2-123	106.2	79.4	0.294	0.0133632	0.0421	0.00180803	0.82631	23.753	1.0201	0.0504	0.00141988	0.471966	261.7	9.7	265.9	9.8	210	46	1.0158	265.9	9.8
MDZ2-58	219.8	127.8	0.3	0.00744043	0.04213	0.000974718	0.67235	23.7361	0.549156	0.05129	0.00120908	0.437926	266.4	3.4	266	3.1	253	28	0.998581	266	3.1
MDZ2-103	204.2	202.1	0.2997	0.0115732	0.04214	0.00124768	0.87491	23.7304	0.702611	0.05062	0.00123083	0.345779	266.1	7.7	266.1	5.7	233	36	0.999693	266.1	5.7
MDZ2-57	133.8	112.4	0.2982	0.00818103	0.04216	0.000960514	0.41009	23.7192	0.540384	0.05103	0.00136074	0.414471	265	4.4	266.2	2.9	240	41	1.00458	266.2	2.9
MDZ2-53	204	196.6	0.3037	0.00819411	0.04217	0.000946691	0.55655	23.7135	0.532355	0.05208	0.00126057	0.501567	269.3	4.3	266.3	2.7	288	31	0.988798	266.3	2.7
MDZ2-110	104.7	37.69	0.2977	0.00926607	0.04218	0.00121904	0.56661	23.7079	0.685181	0.0505	0.00156847	0.478728	264.6	5.6	266.3	5.5	216	54	1.00654	266.3	5.5
MDZ2-13	105.7	78.3	0.3112	0.00929237	0.04221	0.000981159	0.65947	23.6911	0.550692	0.05327	0.00140113	0.418974	275.1	5.4	266.5	3.1	339	38	0.968739	266.5	3.1
MDZ2-117	659	230.6	0.2976	0.00770949	0.0422	0.00107761	0.96185	23.6967	0.605111	0.05125	0.00104433	0.565517	264.5	3.9	266.5	4.2	252	9	1.0073	266.5	4.2
MDZ2-100	463	136	0.3121	0.00775387	0.04231	0.00122807	0.72988	23.6351	0.68602	0.05265	0.0013164	0.469194	275.8	3.6	267.1	5.5	313	34	0.968558	267.1	5.5
MDZ2-21	89.8	63.1	0.3008	0.0104136	0.04232	0.00106719	0.13076	23.6295	0.595868	0.0508	0.00157234	0.446189	266.9	6.6	267.2	4	231	54	1.00112	267.2	4
MDZ2-23	364	143	0.3042	0.00826892	0.04234	0.00105545	0.6225	23.6183	0.588756	0.05171	0.00109507	0.470718	269.7	4.4	267.3	3.9	272	16	0.991101	267.3	3.9
MDZ2-102	525	186.4	0.3006	0.0104931	0.0424	0.00146939	0.93809	23.5849	0.817344	0.05089	0.00112531	0.381468	266.8	6.7	267.7	7.4	236	22	1.00309	267.7	7.4
MDZ2-22	99.9	102.6	0.312	0.0126466	0.04241	0.000989719	0.5613	23.5793	0.550269	0.0535	0.00209402	0.419545	275.7	8.8	267.8	3.2	345	75	0.971346	267.8	3.2
MDZ2-125	102	96.3	0.2985	0.00811732	0.04242	0.00111923	0.72336	23.5738	0.621984	0.0504	0.00141988	0.420028	265.2	4.3	267.8	4.5	211	47	1.00976	267.8	4.5
MDZ2-5	187	90.5	0.3004	0.00835081	0.04243	0.000990062	0.36567	23.5682	0.549941	0.05159	0.00140254	0.454441	266.7	4.5	267.9	3.1	265	43	1.0045	267.9	3.1
MDZ2-121	140.3	98.3	0.2952	0.00954501	0.0424	0.00131115	0.89352	23.5849	0.729322	0.05051	0.00116987	0.47367	262.6	5.9	267.9	6.2	218	27	1.01922	267.9	6.2
MDZ2-55	75.2	65.5	0.343	0.0164942	0.04262	0.000993321	0.58078	23.4632	0.546843	0.0572	0.00213278	0.584345	300	11	269	3.1	493	70	0.898512	269	3.1
MDZ2-14	184.8	99.4	0.3006	0.00788379	0.0427	0.00127743	0.78611	23.4192	0.700616	0.05095	0.00119802	0.496451	266.8	4	269.5	5.9	238	28	1.01012	269.5	5.9
MDZ2-65	646	59.6	0.3027	0.0070435	0.04273	0.000965837	0.90854	23.4028	0.528979	0.05104	0.00106683	0.472423	268.5	2.8	269.7	2.8	246	13	1.00456	269.7	2.8
MDZ2-1	377	318	0.3058	0.00829249	0.04292	0.000993404	0.73095	23.2992	0.53927	0.05163	0.00116527	0.476801	270.9	4.3	270.9	3.1	277	27	1	270.9	3.1
MDZ2-59	171	57.4	0.3039	0.00957612	0.04293	0.0011533	0.59059	23.2937	0.625777	0.05066	0.0013552	0.482585	269.4	5.8	271	4.8	237	47	1.00567	271	4.8
MDZ2-40	89.1	63.8	0.3036	0.0098848	0.04293	0.000974061	0.39466	23.2937	0.528523	0.0509	0.00157363	0.443985	269.2	6.1	271	2.9	233	54	1.00654	271	2.9
MDZ2-99	113.2	105.6	0.3074	0.0115688	0.043	0.00128144	0.6804	23.2558	0.693047	0.05159	0.00133683	0.469336	274.4	6.5	271.4	5.9	266	38	0.9972	271.4	5.9
MDZ2-77	963	453	0.3033	0.00695387	0.04306	0.000962583	0.94519	23.2234	0.519147	0.05127	0.00105785	0.542436	268.9	2.6	271.8	2.7	253	12	1.0104	271.8	2.7
MDZ2-120	160.2	114.4	0.299	0.0125204	0.0431	0.00227003	0.95319	23.2019	1.22202	0.0519	0.00166356	0.364707	265.4	8.3	272	13	278	56	1.0241	272	13
MDZ2-101	139.2	62.4	0.311	0.0117766	0.0432	0.00156093	0.91735	23.1482	0.836403	0.05215	0.00117913	0.395017	275	7.7	272.3	7.8	291	24	0.991569	272.3	7.8
MDZ2-67	133.3	91.2	0.3049	0.00827923	0.0432	0.00108724	0.64535	23.1482	0.582584	0.05057	0.00116096	0.490543	270.2	4.4	272.6	4.1	221	26	1.00895	272.6	4.1
MDZ2-11	690	333.6	0.3077	0.00684629	0.04322	0.000993623	0.6962	23.1374	0.531927	0.05205	0.00112631	0.448378	272.4	2.3	272.8	3	287	19	1.00147	272.8	3
MDZ2-64	288	113.1	0.3145	0.00963608	0.04324	0.00106994	0.74143	23.1267	0.572255	0.05205	0.00123259	0.487188	277.6	5.6	272.9	3.9	287	29	0.982792	272.9	3.9
MDZ2-119	184	87	0.31	0.0180953	0.0433	0.00190787	0.95658	23.0947	1.01759	0.05122	0.00131217	0.4641	274	13	273	10	249	37	0.996625	273	10
MDZ2-19	295	116.4	0.3185	0.00895918	0.04328	0.00100978	0.35917	23.1054	0.539081	0.0533	0.00146163	0.477413	280.7	4.8	273.1	3.2	341	44	0.972925	273.1	3.2
MDZ2-71	633	177	0.3116	0.00798986	0.04327	0.000975406	0.80241	23.1107	0.520969	0.05211	0.00116472	0.444383	275.4	3.9	273.1	2.8	290	23	0.991467	273.1	2.8
MDZ2-114	528	195	0.3101	0.0106843	0.04327	0.00125579	0.9382	23.1107	0.670725	0.05194	0.00125825	0.494239	274.2	6.7	273.1	5.6	282	32	0.995667	273.1	5.6
MDZ2-63	171	120.5	0.3112	0.00892738	0.04333	0.00105404	0.4723	23.0787	0.561408	0.052	0.0015138	0.447693	275.1	4.9	273.5	3.7	285	48	0.993931	273.5	3.7
MDZ2-43	179.3	129.8	0.3068	0.00779041	0.04334	0.000958876	0.47408	23.0734	0.510487	0.05091	0.00130109	0.441685	271.7	3.8	273.5	2.5	235	37	1.00664	273.5	2.5
MDZ2-39	322	166	0.306	0.00742256	0.04333	0.000927306	0.78013	23.0787	0.493907	0.05094	0.00116256	0.485916	271	3.3	273.5	2	237	25	1.00872	273.5	2
MDZ2-37	331	214	0.3087	0.0109967	0.0434	0.00156315	0.9142	23.0415	0.829889	0.05155	0.00117808	0.507597	273.1	7.1	273.8	8	265	26	1.00256	273.8	8
MDZ2-54	87.1	55.8	0.3117	0.00937351	0.04341	0.00108456	0.36547	23.0362	0.575538	0.0511	0.00173334	0.459261	275.5	5.5	273.9	4	241	62	0.994328	273.9	4
MDZ2-72	179.5	96.8	0.3094	0.0101932	0.04344	0.00120848	0.88646	23.0203	0.64041	0.05173	0.00121655	0.213369	273.6	6.3	274.1	5.2	273	29	1.00148	274.1	5.2
MDZ2-130	604	330	0.3104	0.00913396	0.04349	0.0011485	0.96071	22.9938	0.607228	0.05184	0.00111128	0.48378	274.5	5.2	274.4	4.6	278	18	0.999776	274.4	4.6
MDZ2-86	591	196.6	0.3028	0.00963977	0.0435	0.00140246	0.95846	22.9885	0.741161	0.05139	0.00107646	0.455329	268.5	5.8	274.6	6.7	258	14	1.02199	274.6	6.7
MDZ2-97	134.7	50.4	0.316	0.0118297	0.0436	0.00148337	0.86746	22.9358	0.780326	0.05131	0.00123105	0.386341	278.5	8.1	275.2	7.1	254	31	0.986687	275.2	7.1
MDZ2-66	83.1	49.5	0.3118	0.00831491	0.04361	0.00103113	0.68351	22.9305	0.542178	0.05138	0.00132093	0.376345	275.5	4.3	275.2	3.4	256	37	0.998532	275.2	3.4
MDZ2-47	366	120.3	0.3076	0.00723098	0.04352	0.00091744	0.75238	22.9779	0.484395	0.05139	0.00116571	0.450129	272.3	2.9	275.3	2.2	258	25	1.00843	275.3	2.2
MDZ2-109	370	349	0.3162	0.00764742	0.04379	0.00127021	0.76747	22.8363	0.662406	0.05197	0.00115778	0.434039	278.9	3.3	276.3	5.7	284	22	0.990348	276.3	5.7
MDZ2-7	119.3	83.6	0.312	0.0135254	0.04379	0.00110879	0.72594	22.8363	0.578231	0.0516	0.00173926	0.545977	275.6	9.1	276.3	4.2	263	65	1.00254	276.3	4.2
MDZ2-76	266	103.4	0.3077	0.00832056	0.04382	0.0011406	0.77225	22.8206	0.594005	0.05111	0.00116554	0.496131	272.4	4.3	276.5	4.5	245	25	1.01495	276.5	4.5
MDZ2-68	158.8	108.9	0.3162	0.00935965	0.04396	0.000970099	0.52784	22.7479	0.501997	0.0516	0.00150832	0.372047	279	5.3	277.3	2.5	266	49	0.994111	277.3	2.5
MDZ2-36	311	25.6	0.3165	0.00718533	0.0441	0.000922401	0.2663	22.6757	0.474289	0.05183	0.00116882	0.482702	279.2	2.6	278.2	1.7	277	24	0.996383	278.2	1.7
MDZ2-50	143.5	141.3	0.3125	0.00782001	0.0441	0.000938256	0.19397	22.6757	0.482441	0.05149	0.00115818	0.465678	276.1	3.6	278.2	1.9	262	23	1.00753	278.2	1.9
MDZ2-95	152.9	131.9	0.3249	0.0113452	0.04411	0.00126027	0.7275	22.6706	0.647723	0.0535	0.00153457	0.431363	285.6	7.1	278.3	5.6	347	46	0.974073	278.3	5.6
MDZ2-115	460	227.7	0.315	0.0100265	0.04413	0.00125343	0.87589	22.6603	0.643623	0.05153	0.00120791	0.492108	278	6	278.4	5.5	264	28	1.0012	278.4	5.5
MDZ2-48	106.9	78.4	0.3183	0.00874791	0.04414	0.00107305	0.68878	22.6552	0.550751	0.05214	0.00121833	0.377532	280.5	4.6	278.5	3.8	291	27	0.992337	278.5	3.8
MDZ2-74	223.6	160.2	0.324	0.0127668	0.04425	0.00111608	0.9277	22.5989	0.56999	0.05323	0.00140053	0.295764	285.2	8.4	279.1	4.2	337	38	0.979465	279.1	4.2
MDZ2-51	124.6	68.5	0.3148	0.00912138	0.04431	0.00095653	0.31647	22.5683	0.487187	0.0515	0.00143558	0.500042	277.8	5.1	279.5	2.2	263	46	1.00575	279.5	2.2
MDZ2-60	159	89.2	0.3151	0.010987	0.0444	0.00116234	0.80488	22.5225	0.589615	0.05102	0.00138062	0.439579	278	6.9	280.1	4.6	240	41	1.00691	280.1	4.6
MDZ2-62	330	214	0.3188	0.00875519	0.04447	0.00110753	0.95105	22.4871	0.560045	0.0516	0.00106931	0.449334	280.9	4.6	280.5	4.1	268	12	0.998227	280.5	4.1
MDZ2-89	1659	787	0.318	0.0153769	0.0446	0.00209897	0.99334	22.4215	1.0552	0.05265	0.00107374	0.514715	280	11	281	12	313.5	9.2	1.00328	281	12
MDZ2-118	144.4	90.7	0.3141	0.0111402	0.04461	0.00127441	0.68742	22.4165	0.64039	0.0512	0.00165486	0.628687	277.3	7.1	281.3	5.6	247	61	1.01439	281.3	5.6
MDZ2-49	281.9	108.6	0.3181	0.00741047	0.04465	0.000948604	0.94411	22.3964	0.475819	0.05165	0.00111892	0.497313	280.5	2.9	281.6	2	270	19	1.00411	281.6	2
MDZ2-32	785	941	0.3272	0.00861301	0.04475	0.00108877	0.90315	22.3464	0.54369	0.05299	0.00114371	0.352387	287.4	4.3	282.2	3.8	328	18	0.981907	282.2	3.8
MDZ2-24	628	381	0.3229	0.0095977	0.04481	0.00103613	0.86849	22.3164	0.51602	0.05213	0.0012902	0.518792	284	5.4	282.6	3.2	290	34	0.99507	282.6	3.2
MDZ2-4	185.3	105.5	0.3333	0.00952237	0.04581	0.00126346	0.7027	21.8293	0.60206	0.0532	0.0013312	0.343795	292.1	5.2	288.7	5.3	337	34	0.98836	288.7	5.3
MDZ2-75	116.7	74.1	0.3284	0.0103508	0.04597	0.00117397	0.74524	21.7533	0.555529	0.05153	0.00128648	0.501755	288.3	6.1	289.7	4.5	274	39	1.00482	289.7	4.5
MDZ2-8	341	331	0.3295	0.00776132	0.04602	0.00112104	0.87167	21.7297	0.529333	0.05212	0.00110281	0.528911	289.2	3.2	290	4	291	16	1.00277	290	4
MDZ2-88	84.2	43.1	0.3237	0.00889509	0.04638	0.00133493	0.86091	21.561	0.62058	0.05155	0.00129887	0.515565	284.7	4.6	292.3	5.9	264	35	1.02639	292.3	5.9
MDZ2-34	251	132	0.3297	0.00756114	0.04642	0.000999413	0.59999	21.5424	0.463804	0.05115	0.00120143	0.480738	289.3	2.8	292.5	2.3	247	28	1.01095	292.5	2.3
MDZ2-78	428.7	197.6	0.3313	0.00836145	0.04649	0.00120724	0.92998	21.51	0.558566	0.0519	0.00110197	0.443178	290.5	3.9	292.9	4.8	281	16	1.00818	292.9	4.8
MDZ2-91	357	113.2	0.3328	0.0110337	0.04719	0.00135339	0.94703	21.1909	0.607746	0.05195	0.00119483	0.303622	291.7	6.7	297.2	6	282	26	1.01901	297.2	6
MDZ2-83	172	103	0.331	0.0191787	0.0477	0.00212606	0.96763	20.9644	0.934411	0.0515	0.00158142	0.512757	290	14	301	12	278	58	1.03464	301	12
MDZ2-42	468	367.6	0.3569	0.0119629	0.04789	0.00107586	0.89464	20.8812	0.469102	0.0537	0.00153736	0.326391	309.8	7.2	301.5	3	358	44	0.973077	301.5	3
MDZ2-17	260.6	328	0.3604	0.0102589	0.04969	0.00125109	0.73869	20.1248	0.506701	0.05298	0.00132169	0.398544	312.5	5.5	312.6	4.6	337	29	1.00032	312.6	4.6
MDZ2-20	181.5	130.1	0.4	0.0152643	0.0524	0.00151931	0.68202	19.084	0.55333	0.0553	0.00178416	0.392581	341.7	9.2	329.1	6.5	421	57	0.963126	329.1	6.5
MDZ2-79	155.5	98.5	0.4321	0.010578	0.06018	0.00138735	0.72063	16.6168	0.383074	0.05291	0.00114991	0.502963	364.6	4.4	376.7	4.2	325	19	1.03305	376.7	4.2
MDZ2-84	109.8	55.9	0.531	0.0235326	0.0675	0.00319883	0.95646	14.8148	0.702075	0.05755	0.0014368	0.274702	432	14	421	18	512	33	0.973647	421	18
MDZ2-38	67.6	31.8	0.554	0.0329206	0.0706	0.00313588	0.93917	14.1643	0.629144	0.05607	0.00146326	0.339627	447	20	440	17	454	36	0.982476	440	17
MDZ2-10	65.1	61.9	0.706	0.0331568	0.0862	0.00390156	0.91046	11.6009	0.525078	0.05972	0.00147766	0.440491	542	18	533	21	593	32	0.983395	533	21
MDZ2-127	98.1	52.2	0.724	0.0201413	0.0888	0.00220095	0.86279	11.2613	0.279116	0.0593	0.00168719	0.386674	553	8.1	548.5	7.6	576	44	0.991702	548.5	7.6
MDZ2-107	120.7	75.3	0.866	0.0363866	0.1039	0.00398473	0.9605	9.62464	0.36912	0.06043	0.00141715	0.397945	633	18	637	20	618	26	1.00605	637	20
MDZ2-6	294	109.4	3.48	0.249888	0.253	0.016781	0.99086	3.95257	0.262167	0.09989	0.00212699	0.418027	1519	53	1452	82	1622	14	0.895191	1622.04	39.6185
MDZ2-45	283	128.4	3.6	0.148607	0.2517	0.00962191	0.99694	3.97298	0.151878	0.10348	0.00210068	0.342324	1549	29	1447	42	1687.4	6.5	0.933983	1687.46	37.4556
MDZ2-29	971	153.8	4.3	0.147635	0.2997	0.0107302	0.95388	3.33667	0.119464	0.10349	0.00211198	0.402639	1693	22	1690	44	1687.5	7.5	1.00148	1687.63	37.6527
MDZ2-105	362	207.2	3.77	0.141722	0.265	0.0107042	0.99403	3.77359	0.152427	0.10399	0.00210582	0.520862	1595	30	1515	47	1696.6	5.9	0.955239	1696.52	37.3202
MDZ2-131	443	246.6	4.04	0.136487	0.2799	0.00935882	0.99496	3.57271	0.119458	0.1044	0.00211089	0.42684	1641	22	1591	37	1703.7	5.5	0.968685	1703.77	37.229
MDZ2-133	341	105.8	3.928	0.119464	0.2697	0.0083699	0.98775	3.70782	0.115069	0.1051	0.00213432	0.452174	1619	18	1539	32	1716	6.4	0.950484	1716.06	37.3336
MDZ2-73	132.9	87.2	4.337	0.107205	0.2938	0.0072227	0.95746	3.40368	0.083675	0.10657	0.00218926	0.541211	1700	12	1660	21	1741.5	8.7	0.976515	1741.56	37.6459
MDZ2-113	898	188	4.04	0.170378	0.2752	0.0107207	0.99485	3.63372	0.141556	0.1068	0.00217313	0.546693	1642	29	1566	46	1745.4	6.9	0.954244	1745.51	37.2697
MDZ2-108	1277	307.3	4	0.128062	0.2687	0.00866717	0.99625	3.72162	0.120044	0.10792	0.00216765	0.59435	1633	21	1534	34	1764.5	3.4	0.93881	1764.59	36.7025
MDZ2-80	165.2	99.5	4.444	0.101979	0.3006	0.00690682	0.95231	3.32668	0.0764364	0.10797	0.0021892	0.3848	1720.5	9.3	1694	17	1765.5	6.1	0.984716	1765.44	37.0464
MDZ2-106	698	174	4.37	0.165042	0.2906	0.0107977	0.9931	3.44116	0.127861	0.10856	0.0022025	0.292955	1706	27	1644	45	1775.3	6.1	0.96358	1775.39	37.0232
MDZ2-46	116	61.7	4.723	0.110325	0.312	0.00696761	0.90758	3.20513	0.0715772	0.10923	0.00226817	0.427013	1771	10	1750	15	1787	10	0.988264	1786.61	37.8406
MDZ2-85	187.7	143.8	4.68	0.176808	0.3162	0.0116633	0.98501	3.16255	0.116654	0.10958	0.00223148	0.525314	1763	27	1771	48	1792.4	7	1.00424	1792.44	37.083
MDZ2-93	676	249	4.21	0.180803	0.285	0.0141947	0.99442	3.50877	0.174758	0.10986	0.00226258	0.426713	1685	37	1618	65	1797	9	0.964512	1797.09	37.4826
MDZ2-35	899	152.4	3.972	0.0983601	0.2604	0.00675376	0.92748	3.84025	0.099601	0.11011	0.00234644	0.340465	1628	12	1492	22	1801	13	0.916115	1801.22	38.7639
MDZ2-18	1321	102	4.009	0.0995481	0.2631	0.00667073	0.98436	3.80084	0.0963677	0.11039	0.00223859	0.314192	1636	12	1506	21	1805.9	6.1	0.828429	1805.84	36.8674
MDZ2-69	681	51.4	4.503	0.127322	0.2883	0.00690556	0.97139	3.46861	0.0830825	0.11257	0.00235185	0.533787	1731	17	1633	19	1841	11	0.943115	1841.32	37.8185
MDZ2-94	1218	322	4.54	0.142635	0.2854	0.0091881	0.99392	3.50385	0.112802	0.11651	0.00238752	0.609584	1737	20	1618	36	1903.3	8	0.931066	1903.36	36.8177
discarded grains
MDZ2-132	876	680	0.1879	0.00682734	0.02639	0.000806643	0.94761	37.8931	1.15825	0.05119	0.00108525	0.465755	174.8	4.8	167.9	3.8	249	16	0.960526	167.541	5.08296
MDZ2-87	174.9	119.7	0.19	0.00693397	0.02696	0.00101505	0.88912	37.092	1.39653	0.0523	0.00159189	0.391656	176.6	4.9	171.5	5.4	294	55	0.971121	170.888	6.38787
MDZ2-44	127.8	48.7	0.2565	0.00615442	0.03696	0.000805492	0.32782	27.0563	0.589654	0.05055	0.00135356	0.551956	231.8	2.7	233.9	2	219	41	1.00906	234.05	5.0576
MDZ2-9	136.7	115.2	0.3252	0.0117619	0.039	0.00126823	0.61909	25.641	0.833811	0.0599	0.00207971	0.366062	285.8	7.5	246.9	6.5	598	61	0.863891	243.907	7.86487
MDZ2-92	60.9	36.9	0.67	0.0644093	0.0499	0.00223517	0.63098	20.0401	0.897657	0.0987	0.00823994	0.165491	518	39	314	12	1570	160	0.606178	295.709	13.5085
MDZ2-12	98.6	85.3	1.68	0.0923307	0.109	0.0102349	0.94277	9.17431	0.861448	0.1159	0.00506193	0.712597	1000	32	666	59	1889	72	0.666	621.493	57.0891
MDZ2-98	520	189.1	1.87	0.0793647	0.1406	0.00556303	0.99274	7.11238	0.281411	0.09445	0.0019442	0.36136	1070	25	848	27	1517.1	9.3	0.792523	819.012	31.5598
MDZ2-70	267	39.1	3.92	0.525877	0.171	0.018322	0.99516	5.84795	0.626587	0.1586	0.00879213	0.632007	1600	120	1010	100	2432	95	0.63125	906.949	95.135
MDZ2-128	424	139	2.24	0.0987474	0.1779	0.00732252	0.98974	5.62113	0.231371	0.0914	0.00198355	0.359304	1193	28	1055	35	1455	16	0.884325	1032.81	41.2765
MDZ2-122	1231	54	3.45	0.192772	0.233	0.0128731	0.99802	4.29185	0.237121	0.10751	0.00218709	0.375382	1514	42	1349	62	1757.6	6.7	1.30289	1313.42	70.6913
MDZ2-30	381	395	5.18	0.143989	0.347	0.00957724	0.99412	2.88184	0.0795393	0.10811	0.00218291	0.446092	1848	17	1920	32	1767.8	5	0.920729	1767.81	36.8813
MDZ2-31	2383	518	4.255	0.130549	0.2744	0.00843079	0.97039	3.64432	0.11197	0.11246	0.00226093	0.462768	1684	19	1563	33	1839.6	3.7	1.17697	1839.55	36.3998
MDZ3
MDZ3-70	136.4	52.4	0.2906	0.0097	0.0408	0.0012	0.91668	24.5098	0.720877	0.05162	0.00069	-0.17462	258.9	7.6	258	7.2	267	30	0.996524	258	7.2
MDZ3-30	197	156	0.2999	0.0073	0.04143	0.00083	0.87426	24.1371	0.483558	0.0523	0.00065	0.21766	266.2	5.6	261.7	5.1	297	28	0.983095	261.7	5.1
MDZ3-51	1024	753	0.2969	0.0041	0.04163	0.00062	0.92355	24.0211	0.357749	0.05224	0.00029	0.25146	264	3.2	262.9	3.8	296	13	0.995833	262.9	3.8
MDZ3-36	1238	1283	0.3003	0.0064	0.0418	0.00089	0.9691	23.9234	0.509375	0.05211	0.00023	0.31751	266.6	5	264	5.5	289.8	9.9	0.990248	264	5.5
MDZ3-78	725	419.1	0.3009	0.0061	0.04181	0.00082	0.95941	23.9177	0.469087	0.052	0.00036	-0.1287	267.1	4.8	264.1	5.1	285	16	0.988768	264.1	5.1
MDZ3-23	398.2	201.3	0.3001	0.0069	0.0419	0.00092	0.95807	23.8664	0.524034	0.05238	0.00041	-0.29005	266.4	5.4	264.6	5.7	301	18	0.993243	264.6	5.7
MDZ3-26	611	519	0.3019	0.0062	0.04199	0.00082	0.95247	23.8152	0.465074	0.0525	0.00027	-0.059259	267.8	4.8	265.1	5.1	307	12	0.989918	265.1	5.1
MDZ3-76	667	320.9	0.3027	0.0075	0.04204	0.0009	0.94559	23.7869	0.509234	0.05214	0.00045	-0.2685	269.5	5.6	265.4	5.6	291	20	0.984787	265.4	5.6
MDZ3-31	762	842	0.3063	0.0076	0.0422	0.001	0.98244	23.6967	0.561533	0.05252	0.00026	0.12748	271.2	5.9	266.5	6.4	308	11	0.98267	266.5	6.4
MDZ3-59	476	315.6	0.3009	0.0064	0.04241	0.00091	0.96699	23.5793	0.505947	0.05178	0.00032	0.15622	267	5	267.7	5.6	275	14	1.00262	267.7	5.6
MDZ3-35	478	250.8	0.314	0.0071	0.04242	0.00089	0.92952	23.5738	0.494594	0.05454	0.00052	-0.096012	277.2	5.5	267.8	5.5	392	22	0.966089	267.8	5.5
MDZ3-83	997	548	0.3044	0.0057	0.04254	0.00073	0.95204	23.5073	0.403393	0.05171	0.00031	-0.12095	269.8	4.4	268.5	4.5	272	14	0.995182	268.5	4.5
MDZ3-53	593	377	0.3064	0.0056	0.04277	0.0007	0.9488	23.3809	0.382666	0.05237	0.00037	0.10972	271.3	4.3	270	4.3	301	16	0.995208	270	4.3
MDZ3-32	882	425.7	0.3087	0.0072	0.04279	0.00093	0.95952	23.3699	0.507924	0.0522	0.00035	-0.11159	273.1	5.6	270.1	5.7	296	15	0.989015	270.1	5.7
MDZ3-87	635	334.7	0.3146	0.0065	0.04278	0.00094	0.94329	23.3754	0.513625	0.05299	0.00039	0.46172	277.6	5	270.1	5.8	328	17	0.972983	270.1	5.8
MDZ3-68	1083	859	0.3097	0.005	0.04282	0.0007	0.91716	23.3536	0.381773	0.05237	0.00035	0.13221	273.9	3.8	270.3	4.3	301	15	0.986857	270.3	4.3
MDZ3-77	245.9	224	0.3071	0.0058	0.04286	0.00093	0.86828	23.3318	0.506266	0.05207	0.00069	0.24811	271.9	4.5	270.5	5.7	286	30	0.994851	270.5	5.7
MDZ3-67	446	368	0.3047	0.0059	0.04287	0.0008	0.92837	23.3263	0.435294	0.05141	0.00036	0.097013	270	4.6	270.6	5	259	16	1.00222	270.6	5
MDZ3-33	805	524	0.3106	0.0051	0.0429	0.00087	0.94261	23.31	0.472721	0.05215	0.00033	0.22949	274.6	3.9	270.7	5.4	291	14	0.985798	270.7	5.4
MDZ3-4	472.3	540.2	0.3043	0.0051	0.04293	0.00073	0.90256	23.2937	0.396097	0.05202	0.00041	0.13369	269.7	3.9	271	4.5	286	18	1.00482	271	4.5
MDZ3-61	514	233.7	0.3059	0.0066	0.04299	0.00091	0.94694	23.2612	0.492387	0.05192	0.00035	0.17286	270.9	5.1	271.3	5.6	281	15	1.00148	271.3	5.6
MDZ3-79	174.7	89.2	0.3155	0.0081	0.043	0.00085	0.78461	23.2558	0.459708	0.05346	0.00087	-0.0069499	278.3	6.3	271.4	5.3	345	37	0.975207	271.4	5.3
MDZ3-39	797	614	0.3097	0.0076	0.0431	0.0011	0.96235	23.2019	0.592159	0.0527	0.0004	0.1434	274.9	6.1	271.9	6.8	315	17	0.989087	271.9	6.8
MDZ3-56	486	353	0.3101	0.007	0.0431	0.001	0.9465	23.2019	0.538326	0.05192	0.00034	0.090449	274.2	5.4	272.1	6.2	281	15	0.992341	272.1	6.2
MDZ3-82	173.6	92.3	0.3177	0.0093	0.04315	0.00087	0.86004	23.175	0.467259	0.05328	0.00068	-0.12729	279.9	7.2	272.3	5.4	346	32	0.972847	272.3	5.4
MDZ3-10	1227	748	0.3124	0.0085	0.0432	0.001	0.96639	23.1482	0.535837	0.05279	0.00034	-0.35157	277	6.4	272.7	6.4	319	15	0.984477	272.7	6.4
MDZ3-85	2775	4523	0.3141	0.0046	0.04329	0.00059	0.97676	23.1	0.314831	0.0525	0.00021	0.10374	277.3	3.6	273.2	3.6	307.1	9.2	0.985215	273.2	3.6
MDZ3-15	991	315.1	0.3161	0.0072	0.04335	0.00088	0.96456	23.068	0.468279	0.05246	0.00028	-0.19783	278.8	5.5	273.5	5.4	305	12	0.98099	273.5	5.4
MDZ3-97	922	802	0.3098	0.0078	0.0432	0.001	0.97838	23.1482	0.535837	0.05193	0.00024	-0.11698	273.9	6	273.6	6.6	282	11	0.998905	273.6	6.6
MDZ3-1	491	447	0.3107	0.0087	0.0434	0.0012	0.94145	23.0415	0.637092	0.0523	0.0005	0.16047	274.6	6.7	273.7	7.2	298	22	0.996723	273.7	7.2
MDZ3-11	234	84.9	0.3177	0.0084	0.0434	0.001	0.91779	23.0415	0.53091	0.05326	0.00053	-0.047785	280	6.4	273.7	6.3	338	23	0.9775	273.7	6.3
MDZ3-38	548	282	0.3072	0.0067	0.04339	0.00098	0.95734	23.0468	0.520531	0.05169	0.0003	-0.042935	271.9	5.2	273.8	6	271	13	1.00699	273.8	6
MDZ3-98	394	186.2	0.3131	0.0064	0.04344	0.00061	0.87082	23.0203	0.323259	0.05185	0.00044	-0.26389	276.5	4.9	274.1	3.7	278	19	0.99132	274.1	3.7
MDZ3-18	535	203.6	0.3119	0.0085	0.0435	0.0012	0.96783	22.9885	0.634166	0.05247	0.00039	0.075118	275.5	6.6	274.2	7.4	305	17	0.995281	274.2	7.4
MDZ3-47	834	209	0.336	0.01	0.0435	0.001	0.58457	22.9885	0.528471	0.0564	0.0014	0.26425	294.3	7.7	274.2	6.3	462	53	0.931702	274.2	6.3
MDZ3-43	409	211.4	0.3119	0.007	0.04352	0.00096	0.93947	22.9779	0.506866	0.05165	0.0004	0.068026	275.5	5.4	274.6	5.9	273	19	0.996733	274.6	5.9
MDZ3-72	751	372.5	0.3187	0.0063	0.04354	0.00075	0.96774	22.9674	0.395626	0.05263	0.00033	-0.087992	280.8	4.8	274.7	4.6	312	14	0.978276	274.7	4.6
MDZ3-3	728	462.6	0.3126	0.0053	0.04356	0.00064	0.95195	22.9568	0.337291	0.052	0.00025	-0.043748	276.1	4.1	274.9	4	285	11	0.995654	274.9	4
MDZ3-44	369	165.9	0.313	0.0087	0.0436	0.0011	0.94802	22.9358	0.578655	0.05234	0.0005	-0.18268	276.3	6.8	274.9	6.7	299	22	0.994933	274.9	6.7
MDZ3-7	571	233.8	0.3198	0.0071	0.04368	0.00065	0.71734	22.8938	0.340681	0.05361	0.00078	-0.11615	281.7	5.5	275.6	4	352	32	0.978346	275.6	4
MDZ3-34	218.5	100.5	0.3085	0.0066	0.04375	0.00087	0.79704	22.8571	0.454531	0.05215	0.0006	0.21487	272.9	5.1	276	5.4	291	26	1.01136	276	5.4
MDZ3-63	233.3	70.2	0.3114	0.009	0.04374	0.00096	0.90459	22.8624	0.50178	0.05157	0.00067	-0.23563	275.1	6.9	276	5.9	265	30	1.00327	276	5.9
MDZ3-22	1009	400.7	0.3187	0.0069	0.04389	0.00074	0.95203	22.7842	0.38415	0.05254	0.00035	-0.25973	280.8	5.3	276.9	4.6	308	15	0.986111	276.9	4.6
MDZ3-17	132.9	92.6	0.3155	0.0067	0.04398	0.00086	0.84455	22.7376	0.444619	0.05271	0.00068	0.081141	278.3	5.2	277.4	5.3	315	30	0.996766	277.4	5.3
MDZ3-6	419.4	196.9	0.3311	0.0079	0.0442	0.001	0.95276	22.6244	0.511865	0.05505	0.00035	-0.16605	290.3	6.1	278.6	6.4	414	14	0.959697	278.6	6.4
MDZ3-28	229.8	109	0.3164	0.0073	0.04445	0.00082	0.84431	22.4972	0.415021	0.05143	0.00071	-0.0037995	279	5.6	280.3	5.1	258	32	1.00466	280.3	5.1
MDZ3-89	220.4	98.8	0.336	0.011	0.0446	0.001	0.80711	22.4215	0.502725	0.0541	0.00076	-0.23922	294.2	8	281	6.1	373	31	0.955133	281	6.1
MDZ3-5	168.6	46.76	0.3206	0.0053	0.04463	0.00067	0.65998	22.4064	0.336373	0.05252	0.00074	0.25294	282.3	4	281.5	4.1	313	34	0.997166	281.5	4.1
MDZ3-14	1091	882	0.3339	0.008	0.04468	0.00097	0.975	22.3814	0.485898	0.05405	0.00028	-0.093713	292.4	6	281.8	6	373	12	0.963748	281.8	6
MDZ3-12	436	275	0.3239	0.0093	0.0448	0.0012	0.95258	22.3214	0.597895	0.05201	0.0004	-0.031663	284.7	7.1	282.5	7.5	285	18	0.992273	282.5	7.5
MDZ3-27	837	437.5	0.3227	0.0065	0.0448	0.0009	0.95424	22.3214	0.448422	0.05219	0.00032	0.18597	283.8	5	282.5	5.5	293	14	0.995419	282.5	5.5
MDZ3-21	461.8	83	0.3226	0.006	0.04492	0.00091	0.92155	22.2618	0.450985	0.05235	0.00041	0.057161	283.9	4.6	283.2	5.6	300	18	0.997534	283.2	5.6
MDZ3-20	332.4	54.9	0.331	0.0066	0.04512	0.00087	0.93762	22.1631	0.427347	0.05294	0.00037	-0.066264	290.2	5	284.5	5.4	326	16	0.980358	284.5	5.4
MDZ3-8	648	371.3	0.335	0.011	0.0451	0.0011	0.85935	22.173	0.540804	0.05462	0.00086	-0.021478	295.2	7.7	284.6	6.8	394	35	0.964092	284.6	6.8
MDZ3-74	638	686	0.3406	0.0093	0.0453	0.0012	0.88237	22.0751	0.58477	0.05432	0.00067	0.25614	297.4	7	285.4	7.3	383	28	0.95965	285.4	7.3
MDZ3-24	491.4	319.4	0.3398	0.008	0.04534	0.00091	0.94249	22.0556	0.442668	0.0548	0.0004	-0.12676	298.2	6.5	285.8	5.6	403	16	0.958417	285.8	5.6
MDZ3-19	585	284	0.3274	0.009	0.0452	0.001	0.96898	22.1239	0.489467	0.05203	0.00039	-0.40868	287.4	6.8	286	6.6	286	17	0.995129	286	6.6
MDZ3-2	1635	1010	0.3327	0.0051	0.04544	0.00071	0.98576	22.007	0.34386	0.05355	0.00016	0.17768	291.5	3.9	286.4	4.4	352	6.9	0.982504	286.4	4.4
MDZ3-46	1355	193.5	0.3309	0.0069	0.0462	0.00095	0.97966	21.645	0.445082	0.05218	0.00021	0.035858	290.2	5.3	291.1	5.9	293.1	9.4	1.0031	291.1	5.9
MDZ3-62	908	778	0.335	0.011	0.0466	0.0016	0.98703	21.4592	0.736797	0.05226	0.0003	0.0041628	293.3	8.8	293.7	9.7	296	13	1.00136	293.7	9.7
MDZ3-58	266	205.9	0.363	0.0093	0.0476	0.0012	0.94287	21.0084	0.529624	0.05485	0.00048	0.17958	314.3	6.9	300	7.6	405	20	0.954502	300	7.6
MDZ3-75	521	502	0.489	0.012	0.0635	0.0016	0.98581	15.748	0.396801	0.05581	0.00024	0.095164	404.3	8.5	396.7	9.7	444.4	9.4	0.981202	396.7	9.7
MDZ3-94	233	134.3	0.541	0.012	0.0689	0.0013	0.91677	14.5138	0.273845	0.05657	0.00042	-0.19693	439.1	7.9	429.4	7.9	474	17	0.977909	429.4	7.9
MDZ3-9	213.7	116.2	0.567	0.014	0.07	0.0014	0.92293	14.2857	0.285714	0.0598	0.0005	0.18071	457.2	8.6	436.2	8.4	596	18	0.954068	436.2	8.4
MDZ3-13	296.8	65.2	0.558	0.013	0.0722	0.0016	0.96725	13.8504	0.306934	0.05606	0.00031	-0.25517	449.6	8.2	449.5	9.4	454	12	0.999778	449.5	9.4
MDZ3-48	546	325.5	1.617	0.027	0.1512	0.0026	0.98335	6.61376	0.113729	0.07773	0.00024	0.22952	976	11	908	15	1141.2	5.8	0.930328	908	15
MDZ3-90	79.9	30.03	1.851	0.044	0.1794	0.0039	0.96069	5.57414	0.121177	0.07494	0.00046	0.016344	1066	15	1064	21	1067	12	0.998124	1064	21
MDZ3-45	416	81.2	2.077	0.05	0.1902	0.0045	0.98494	5.25762	0.124392	0.07951	0.00034	-0.021391	1140	17	1122	24	1184.7	8.5	0.984211	1122	24
MDZ3-71	307	232	2.35	0.07	0.2051	0.0069	0.99504	4.87567	0.164028	0.08297	0.00025	-0.13708	1231	23	1202	37	1268.5	5.8	0.947576	1268.5	37
MDZ3-84	85.3	100.2	3.012	0.065	0.242	0.0057	0.97151	4.13223	0.0973294	0.0905	0.00052	0.1812	1410	16	1396	30	1436	11	0.972145	1436	11
MDZ3-55	151	82.9	3.334	0.066	0.2569	0.0049	0.98219	3.89256	0.0742451	0.09448	0.00038	-0.26655	1488	15	1474	25	1517.6	7.6	0.97127	1517.6	7.6
MDZ3-80	933	426.9	3.039	0.074	0.2324	0.0056	0.9982	4.30293	0.103685	0.09468	0.00014	-0.19375	1420	18	1346	29	1521.7	2.7	0.884537	1521.7	2.7
MDZ3-25	739	149.5	4.236	0.075	0.2839	0.0051	0.99	3.52237	0.0632761	0.10829	0.00027	-0.049698	1680	15	1611	25	1770.8	4.6	0.909758	1770.8	4.6
MDZ3-41	120	62.45	4.572	0.079	0.3057	0.0055	0.97826	3.27118	0.0588534	0.10918	0.00037	0.34537	1743	14	1719	27	1785.6	6.3	0.962702	1785.6	6.3
MDZ3-50	184.6	110.3	4.872	0.098	0.3198	0.0067	0.98774	3.12695	0.0655116	0.11037	0.00034	-0.068625	1796	17	1788	33	1805.4	5.7	0.990362	1805.4	5.7
MDZ3-60	507.9	407	4.61	0.12	0.3011	0.0075	0.99594	3.32116	0.0827256	0.11173	0.00024	-0.1679	1750	21	1696	37	1827.6	4	0.927993	1827.6	4
MDZ3-16	29.2	47.7	11.82	0.69	0.456	0.027	0.99308	2.19298	0.129848	0.1873	0.0012	0.21983	2579	58	2410	120	2718	10	0.886681	2718	10
discordant or anomalously young grains
MDZ3-49	310	772	0.0222	0.0012	0.003178	7e-05	0.4102	314.663	6.93091	0.05	0.0023	0.062052	22.3	1.2	20.46	0.45	186	96	0.917489
MDZ3-93	1029	1025	0.0668	0.002	0.01002	0.00026	0.9144	99.8004	2.58963	0.0481	0.00059	-0.12627	65.6	1.9	64.3	1.6	108	30	0.980183
MDZ3-69	452.7	265.3	0.0679	0.0014	0.01013	0.0002	0.77313	98.7167	1.949	0.04851	0.00056	0.37956	66.7	1.3	65	1.3	123	27	0.974513
MDZ3-29	358	160.1	0.0722	0.0024	0.01079	0.00023	0.66037	92.6784	1.97554	0.04841	0.00093	-0.020613	70.8	2.2	69.2	1.5	119	43	0.977401
MDZ3-37	147.6	406.4	1.309	0.082	0.02251	0.00066	0.93291	44.4247	1.30255	0.414	0.013	-0.73107	845	35	143.5	4.1	3975	50	0.169822
MDZ3-88	183.2	114.5	0.375	0.013	0.0424	0.0012	0.85213	23.5849	0.667497	0.06322	0.0009	-0.024772	322.9	9.4	267.8	7.2	721	33	0.829359
MDZ3-66	268.7	327.1	0.389	0.0095	0.04511	0.0008	0.84561	22.168	0.393137	0.06279	0.00083	-0.13417	334.7	7.2	284.4	4.9	704	27	0.849716
MDZ3-42	69.4	65.6	0.58	0.014	0.0488	0.001	-0.0036765	20.4918	0.419914	0.0864	0.0031	0.66627	464.3	9.1	307.4	6.3	1363	68	0.662072
MDZ3-96	543	393.4	1.132	0.052	0.05	0.001	0.79869	20	0.4	0.1643	0.0058	-0.54294	772	26	314.3	6.4	2491	61	0.407124
MDZ3-52	401	250.9	0.724	0.03	0.052	0.0012	0.66067	19.2308	0.443787	0.1015	0.0044	-0.3361	562	22	326.5	7.6	1634	85	0.580961
MDZ3-92	196	108.8	1.53	0.19	0.0567	0.0016	0.82974	17.6367	0.497684	0.193	0.021	-0.7135	932	81	355.4	9.6	2740	190	0.38133
MDZ3-57	99	83.1	0.814	0.05	0.0576	0.002	0.78001	17.3611	0.602816	0.1035	0.0044	-0.23581	602	28	361	12	1673	78	0.599668
MDZ3-64	143.9	119.8	1.013	0.029	0.089	0.0047	0.91334	11.236	0.593359	0.0827	0.0022	0.89043	710	14	549	28	1257	51	0.773239
MDZ3-54	184.4	46.01	2.43	0.13	0.1793	0.0041	0.92137	5.57724	0.127533	0.0983	0.0031	-0.75146	1246	39	1063	22	1612	51	0.85313
MDZ3-95	10.71	2.01	19.9	3.8	0.186	0.034	0.99953	5.37634	0.982773	0.773	0.01	-0.77954	3000	160	1080	170	4902	23	0.36
MDZ3-40	183.2	110.1	2.702	0.059	0.1836	0.0037	0.97636	5.44662	0.109763	0.10691	0.00047	-0.052633	1328	16	1086	20	1747.3	8	0.817771
MDZ3-86	428	149.8	5.8	0.28	0.2281	0.0095	0.99565	4.38404	0.182588	0.1835	0.0014	-0.81024	1941	41	1323	50	2685	13	0.681607
MDZ4
MDZ4-61	644	251	0.303	0.0161779	0.0403	0.0021563	0.89198	24.8139	1.3277	0.0549	0.00155422	-0.24919	268	12	255	13	406	44	0.951493	255	13
MDZ4-103	1065	167	0.309	0.01	0.0418	0.0012	0.96901	23.9234	0.686797	0.0535	0.00065	-0.6006	273.4	8	263.9	7.1	349	28	0.965252	263.9	7.1
MDZ4-4	1186	856	0.3224	0.0063	0.04253	0.00076	0.94638	23.5128	0.420168	0.05496	0.00065	0.10617	283.7	4.9	268.5	4.7	409	26	0.946422	268.5	4.7
MDZ4-80	1110	448	0.3174	0.0081	0.0433	0.001	0.98314	23.0947	0.533365	0.05334	0.00031	-0.30363	279.8	6.2	273.1	6.3	343	13	0.976054	273.1	6.3
MDZ4-19	491	214.1	0.3144	0.0069	0.04332	0.00078	0.84561	23.084	0.41564	0.0529	0.00058	-0.14138	278.6	5.1	273.4	4.8	323	25	0.981335	273.4	4.8
MDZ4-95	156.8	72.6	0.306	0.015	0.0433	0.0012	0.84928	23.0947	0.640038	0.0521	0.0011	-0.037972	271	11	273.4	7.7	284	50	1.00886	273.4	7.7
MDZ4-27	1177	443.2	0.3158	0.0044	0.04341	0.00048	0.8938	23.0362	0.254719	0.05289	0.00055	-0.02718	279.5	3	273.9	3	323	23	0.979964	273.9	3
MDZ4-110	1276	888	0.3182	0.0095347	0.04359	0.0012246	0.92683	22.941	0.644494	0.05297	0.00116723	-0.32345	280.5	5.5	275.1	5.3	331	22	0.980749	275.1	5.3
MDZ4-92	857	459	0.3179	0.005	0.04385	0.00063	0.89542	22.805	0.327643	0.05274	0.00042	0.21577	280.3	3.8	276.7	3.9	317	18	0.987157	276.7	3.9
MDZ4-38	471	254	0.3246	0.0068	0.04391	0.00078	0.86818	22.7739	0.404546	0.05334	0.00045	0.10896	285.3	5.2	277	4.8	343	19	0.970908	277	4.8
MDZ4-71	934	336.6	0.3249	0.0065	0.04392	0.00075	0.8919	22.7687	0.388809	0.05371	0.00044	-0.084768	285.6	5	277.1	4.6	358	18	0.970238	277.1	4.6
MDZ4-104	272.5	133.3	0.3154	0.00884482	0.04402	0.00105981	0.61354	22.717	0.546927	0.05169	0.00133204	0.27028	278.3	4.8	277.7	3.6	279	34	0.997844	277.7	3.6
MDZ4-13	357	123.8	0.3145	0.0051	0.04403	0.00062	0.88353	22.7118	0.319812	0.05177	0.00065	-0.2699	277.7	3.9	277.7	3.8	274	29	1	277.7	3.8
MDZ4-8	1249	912	0.3351	0.0058	0.04405	0.00078	0.90837	22.7015	0.401979	0.05504	0.00061	0.1423	293.4	4.4	277.9	4.8	413	25	0.947171	277.9	4.8
MDZ4-64	380.7	180	0.3196	0.007	0.04421	0.00077	0.86792	22.6193	0.393958	0.05277	0.00062	0.021848	281.5	5.4	278.9	4.8	318	27	0.990764	278.9	4.8
MDZ4-82	1487	870	0.3297	0.0063	0.04433	0.0007	0.90032	22.5581	0.356207	0.0543	0.00069	0.12952	289.3	4.8	279.6	4.3	382	29	0.966471	279.6	4.3
MDZ4-33	327	130	0.3101	0.0078	0.04439	0.00096	0.90506	22.5276	0.487193	0.05084	0.00048	-0.23725	274.1	6	280	5.9	239	24	1.02152	280	5.9
MDZ4-34	254	80.6	0.3175	0.0065	0.0445	0.00073	0.85597	22.4719	0.36864	0.05208	0.00045	0.084486	279.9	5	280.6	4.5	288	20	1.0025	280.6	4.5
MDZ4-115	383	147.6	0.3289	0.0098	0.0445	0.0012	0.93897	22.4719	0.605984	0.05372	0.00053	-0.058092	288.6	7.5	280.7	7.5	358	22	0.972626	280.7	7.5
MDZ4-31	430	108.7	0.3282	0.0053	0.04459	0.00064	0.6884	22.4265	0.321888	0.05312	0.00055	0.11519	288.1	4	281.2	3.9	333	24	0.97605	281.2	3.9
MDZ4-21	291	111	0.3248	0.007	0.04459	0.00062	0.74798	22.4265	0.311829	0.05294	0.00063	0.0001921	285.5	5.4	281.2	3.8	325	27	0.984939	281.2	3.8
MDZ4-12	330.4	132.9	0.3194	0.0069	0.04462	0.0007	0.88083	22.4115	0.351592	0.05207	0.00065	-0.36479	281.4	5.3	281.4	4.3	287	29	1	281.4	4.3
MDZ4-2	341.2	98.1	0.327	0.0051	0.04495	0.00066	0.79829	22.2469	0.326651	0.0527	0.00058	0.094532	287.2	3.9	283.4	4	315	25	0.986769	283.4	4
MDZ4-15	240	173	0.3245	0.0078	0.0456	0.0011	0.90326	21.9298	0.529009	0.05228	0.00055	-0.056352	285.3	5.9	287.2	6.6	297	24	1.00666	287.2	6.6
MDZ4-79	1196	26.7	0.419	0.0163164	0.0553	0.00186366	0.95609	18.0832	0.60942	0.05457	0.00122215	-0.3668	355.2	9.7	347	9.3	394	22	0.976914	347	9.3
MDZ4-70	165.7	69.4	0.429	0.011	0.0576	0.0012	0.89751	17.3611	0.36169	0.05408	0.00073	-0.082947	362.5	7.8	360.9	7.6	373	30	0.995586	360.9	7.6
MDZ4-39	767	33.7	0.453	0.015	0.059	0.002	0.67896	16.9491	0.574547	0.0572	0.00054	-0.49034	379	11	370	12	499	21	0.976253	370	12
MDZ4-97	235	42	0.551	0.095	0.0658	0.0099	0.99465	15.1976	2.28656	0.0592	0.0016	-0.63362	434	62	409	60	568	58	0.942396	409	60
MDZ4-5	618	165.5	0.537	0.0161043	0.0674	0.00194348	0.88986	14.8368	0.427819	0.05736	0.00129463	0.16877	436.2	7.8	420.5	8.4	509	24	0.964007	420.5	8.4
MDZ4-35	310	3.8	0.569	0.0406264	0.0683	0.00470276	0.8844	14.6413	1.00812	0.0601	0.00241967	0.23595	457	25	426	27	603	78	0.932166	426	27
MDZ4-22	700	309.5	0.541	0.009	0.0686	0.0011	0.9437	14.5773	0.233746	0.05687	0.00053	0.117	439	6	427.7	6.6	490	21	0.97426	427.7	6.6
MDZ4-26	238.3	163.1	0.533	0.01	0.0686	0.0013	0.82339	14.5773	0.276245	0.05623	0.00069	-0.040801	433.8	6.7	427.9	8.1	460	27	0.986399	427.9	8.1
MDZ4-67	387	30.1	0.736	0.0232525	0.0877	0.00289249	0.94998	11.4025	0.376074	0.06069	0.00131275	0.24053	560	10	542	14	628	18	0.967857	542	14
MDZ4-59	259.9	355.9	0.751	0.019225	0.0904	0.00206612	0.71767	11.0619	0.252825	0.05981	0.00142804	-0.0062188	568.6	6.8	558.1	6.1	595	28	0.981534	558.1	6.1
MDZ4-106	486	202	0.869	0.024	0.0988	0.0023	0.95505	10.1215	0.235621	0.06248	0.00052	-0.0029283	635	13	607	14	690	18	0.955906	607	14
MDZ4-10	481	18.2	0.88	0.022	0.1043	0.0026	0.96537	9.58773	0.239004	0.06093	0.00056	-0.45023	641	12	639	15	636	20	0.99688	639	15
MDZ4-47	74.5	25.5	1.034	0.027	0.11	0.0023	0.84867	9.09091	0.190083	0.06677	0.00087	0.1565	720	13	672	14	829	27	0.933333	672	14
MDZ4-105	955	338	1.187	0.055	0.1165	0.0058	0.96333	8.58369	0.427343	0.073	0.001	0.28199	793	25	710	34	1018	26	0.895334	710	34
MDZ4-57	547	172.5	1.8	0.047	0.164	0.0041	0.93389	6.09756	0.152439	0.078	0.00076	0.34538	1045	17	979	23	1146	19	0.936842	979	23
MDZ4-83	505	45.2	1.856	0.046	0.1733	0.0035	0.9414	5.77034	0.116539	0.07762	0.00038	0.10657	1065	16	1030	19	1137.1	9.6	0.967136	1030	19
MDZ4-41	973	538	2.039	0.055	0.1751	0.0038	0.94231	5.71102	0.12394	0.0831	0.0011	-0.32317	1128	19	1040	21	1271	25	0.921986	1040	21
MDZ4-75	356	180	1.919	0.049	0.1763	0.004	0.90872	5.67215	0.128693	0.0785	0.0011	0.41173	1087	17	1047	22	1159	27	0.963201	1047	22
MDZ4-28	135.5	39.78	1.917	0.034	0.1829	0.0031	0.92163	5.46747	0.092669	0.07625	0.00069	0.23411	1087	12	1083	17	1101	18	0.99632	1083	17
MDZ4-49	61.1	28.63	2.076	0.036	0.1936	0.0021	0.79549	5.16529	0.0560285	0.07788	0.0008	-0.06675	1140	12	1141	11	1143	21	1.00088	1141	11
MDZ4-78	224.5	178.8	2.359	0.052	0.2017	0.0046	0.95721	4.95786	0.11307	0.08483	0.00064	0.28492	1230	16	1184	24	1311	14	0.903127	1311	14
MDZ4-7	142.9	87	3.43	0.087	0.2579	0.0053	0.97081	3.87747	0.0796844	0.09642	0.00073	-0.384	1511	20	1479	27	1556	14	0.950514	1556	14
MDZ4-24	282	56.6	3.759	0.064	0.2745	0.0043	0.96952	3.64299	0.0570668	0.0997	0.001	0.12579	1583	14	1563	22	1618	19	0.966007	1618	19
MDZ4-90	141.7	90	4.322	0.087	0.3042	0.007	0.98157	3.28731	0.0756449	0.10374	0.0007	0.032423	1697	17	1711	35	1692	12	1.01123	1692	12
MDZ4-101	125.9	81.5	4.15	0.1	0.2865	0.0071	0.95717	3.4904	0.0864986	0.1048	0.0012	-0.011718	1663	20	1623	35	1710	21	0.949123	1710	21
MDZ4-74	324	84.9	4.04	0.082	0.277	0.0045	0.87179	3.61011	0.058648	0.1053	0.0013	0.22927	1641	16	1576	23	1718	24	0.917346	1718	24
MDZ4-85	182.4	86.7	4.579	0.06	0.3063	0.0037	0.94141	3.26477	0.0394374	0.10728	0.00062	0.11932	1745	11	1723	18	1754	11	0.982326	1754	11
MDZ4-108	265.9	84.9	4.759	0.097	0.3043	0.0055	0.95974	3.28623	0.0593962	0.1119	0.0011	-0.059499	1777	17	1712	27	1830	19	0.935519	1830	19
MDZ4-73	246.9	58.1	4.79	0.13	0.307	0.0072	0.98626	3.25733	0.0763934	0.11325	0.00083	-0.45791	1782	22	1726	35	1852	13	0.931965	1852	13
MDZ4-14	252	67.9	5.114	0.085	0.3203	0.0051	0.89843	3.12207	0.0497114	0.1156	0.0014	0.42211	1838	14	1791	25	1888	22	0.948623	1888	22
MDZ4-116	216	86.6	5.467	0.139109	0.3375	0.00834101	0.95116	2.96296	0.073227	0.11805	0.00243853	-0.049253	1898	14	1875	23	1926.8	9.3	0.973116	1926.8	9.3
discarded grains
MDZ4-111	11.33	3.51	2.57	0.1	0.0346	0.0012	0.71093	28.9017	1.00237	0.539	0.016	0.047515	1297	31	219.5	7.6	4348	42	0.169237
MDZ4-72	113.5	59	0.382	0.011	0.04613	0.00086	0.74505	21.6779	0.40414	0.0612	0.001	-0.1637	328.7	8.3	290.7	5.3	644	35	0.884393
MDZ4-94	299	91.8	0.915	0.021	0.0806	0.0016	0.92913	12.407	0.246292	0.08074	0.00082	-0.52464	659	11	499.6	9.3	1220	22	0.758118
MDZ4-114	602	104.9	1.75	0.23	0.13	0.013	0.99821	7.69231	0.769231	0.0954	0.0026	-0.96148	1005	86	788	73	1543	48	0.78408
MDZ4-66	983	219	2.42	0.15	0.1564	0.0085	0.99482	6.39386	0.347492	0.1138	0.0021	-0.91857	1256	47	936	47	1866	35	0.745223
MDZ4-48	1002	143	2.9	0.13	0.1877	0.0079	0.98041	5.32765	0.224233	0.1118	0.0013	-0.52943	1378	34	1108	43	1828	20	0.804064
MDZ4-20	338.3	105.9	3.207	0.043	0.2188	0.0029	0.9066	4.57038	0.0605764	0.1065	0.0011	0.19205	1459	10	1275	15	1740	18	0.732759
MDZ4-117	145.3	150	3.42	0.11	0.2377	0.0076	0.97518	4.20698	0.13451	0.10423	0.00084	0.088547	1507	25	1384	43	1700	15	0.814118
MDZ4-55	584	18.4	4.14	0.13	0.2666	0.008	0.95556	3.75094	0.112556	0.1116	0.0011	0.28794	1660	26	1523	40	1830	19	0.83224
MDZ4-109	360	233.1	4.76	0.14	0.2884	0.0091	0.97758	3.46741	0.109409	0.1189	0.0014	0.28211	1781	26	1633	45	1939	21	0.842187
MDZ4-9	510	29.83	11.69	0.3	0.4203	0.0067	0.86568	2.37925	0.0379277	0.1981	0.0033	0.099737	2579	24	2261	30	2809	27	0.804913
MDZ5
MDZ5-38	48	48	0.29	0.018	0.04	0	0.36	25	0.85	0.051	0.002	0.15	258	14	253	7	224	92	0.98	253	7
MDZ5-11	1027	730	0.296	0.008	0.04	0	0.81	24.32	0.54	0.052	0.001	-0.04	263	4	260	3	282	18	0.99	260	3
MDZ5-48	57	68	0.282	0.016	0.04	0	0.41	24.27	1.06	0.049	0.003	0.39	252	12	260	10	160	110	1.03	260	10
MDZ5-5	40	34	0.306	0.016	0.04	0	0.22	24.21	0.59	0.054	0.003	0.06	270	11	261	4	360	110	0.97	261	4
MDZ5-84	36	26	0.299	0.017	0.04	0	0.55	24.15	0.85	0.053	0.003	-0.06	268	13	261	7	320	110	0.98	261	7
MDZ5-13	36	33	0.314	0.018	0.04	0	0.33	23.91	0.71	0.054	0.003	0.04	277	13	264	6	360	110	0.95	264	6
MDZ5-66	52	46	0.318	0.015	0.04	0	0.39	23.84	0.7	0.055	0.003	0.04	280	11	265	6	380	100	0.95	265	6
MDZ5-81	1510	201	0.32	0.012	0.04	0	0.95	23.75	0.78	0.054	0.001	0.41	282	8	266	7	387	28	0.94	266	7
MDZ5-54	90	140	0.315	0.01	0.04	0	0.9	23.62	0.7	0.053	0.001	0.27	278	6	267	6	346	34	0.96	267	6
MDZ5-56	37	25	0.308	0.02	0.04	0	0.67	23.7	0.87	0.052	0.003	-0.21	272	15	267	8	300	100	0.98	267	8
MDZ5-64	48	46	0.336	0.016	0.04	0	0.62	23.64	0.78	0.058	0.003	0.02	294	12	267	7	529	86	0.91	267	7
MDZ5-68	37	31	0.314	0.018	0.04	0	0.35	23.58	0.77	0.055	0.003	0.11	277	13	267	7	400	130	0.97	267	7
MDZ5-24	655	1000	0.307	0.01	0.04	0	0.89	23.58	0.62	0.053	0.001	0.51	272	6	268	4	327	27	0.98	268	4
MDZ5-47	558	76	0.313	0.015	0.04	0	0.97	23.31	1.18	0.053	0.001	0.05	276	11	271	12	328	33	0.98	271	12
MDZ5-102	49	33	0.307	0.014	0.04	0	0.7	23.15	1.22	0.052	0.002	0.39	275	11	272	13	291	95	0.99	272	13
MDZ5-54	378	487	0.31	0.01	0.04	0	0.75	23.2	0.75	0.053	0.001	0.17	274	6	272	7	317	40	0.99	272	7
MDZ5-20	871	143	0.32	0.013	0.04	0	0.95	23.15	0.88	0.054	0.001	0.48	282	8	273	8	357	25	0.97	273	8
MDZ5-24	353	174	0.316	0.019	0.04	0	0.95	23.04	1.16	0.053	0.001	-0.24	279	14	274	13	313	41	0.98	274	13
MDZ5-7	672	304	0.33	0.012	0.04	0	0.92	23.04	0.79	0.054	0.001	0.54	290	7	274	8	381	17	0.95	274	8
MDZ5-19	393	23	0.31	0.011	0.04	0	0.87	22.99	0.74	0.051	0.001	0.04	274	7	275	7	250	31	1	275	7
MDZ5-88	331	167	0.326	0.015	0.04	0	0.96	22.94	0.91	0.053	0.001	0.48	287	11	275	10	318	30	0.96	275	10
MDZ5-4	878	781	0.307	0.008	0.04	0	0.81	22.83	0.56	0.051	0.001	0.05	272	4	276	4	245	23	1.02	276	4
MDZ5-87	250	106	0.34	0.011	0.04	0	0.86	22.88	0.82	0.057	0.002	0.35	297	6	276	8	489	39	0.93	276	8
MDZ5-101	149	90	0.315	0.011	0.04	0	0.85	22.83	0.86	0.053	0.001	0.43	278	7	277	9	305	44	0.99	277	9
MDZ5-44	295	151	0.352	0.013	0.04	0	0.86	22.78	0.95	0.058	0.002	0.48	306	9	277	10	531	36	0.9	277	10
MDZ5-30	323	110	0.316	0.01	0.04	0	0.8	22.84	0.63	0.052	0.001	0.13	279	6	278	5	265	30	1	278	5
MDZ5-76	234	125	0.311	0.012	0.04	0	0.72	22.68	0.64	0.052	0.002	-0.04	276	7	278	5	282	48	1.01	278	5
MDZ5-90	54	41	0.31	0.019	0.04	0	0.56	22.68	0.89	0.051	0.003	0.52	274	14	278	10	230	110	1.02	278	10
MDZ5-50	420	159	0.33	0.013	0.04	0	0.87	22.62	0.72	0.054	0.001	0.46	290	8	279	7	362	35	0.96	279	7
MDZ5-29	167	119	0.33	0.017	0.04	0	0.93	22.52	1.06	0.053	0.001	-0.34	293	10	280	12	336	43	0.96	280	12
MDZ5-97	738	120	0.331	0.014	0.04	0	0.99	22.32	1.05	0.053	0.001	0.4	290	10	282	12	325	25	0.97	282	12
MDZ5-1	253	163	0.326	0.01	0.05	0	0.71	22.19	0.62	0.052	0.001	0.26	286	6	284	5	285	35	0.99	284	5
MDZ5-31	414	151	0.329	0.015	0.05	0	0.93	22.12	0.66	0.053	0.002	0.34	289	11	285	6	331	52	0.99	285	6
MDZ5-72	286	256	0.327	0.01	0.05	0	0.66	21.98	0.62	0.053	0.001	0.13	287	6	287	6	312	44	1	287	6
MDZ5-69	2150	79	0.35	0.012	0.05	0	0.94	21.55	0.74	0.055	0.001	0.46	305	8	292	8	404	31	0.96	292	8
MDZ5-77	1377	835	0.349	0.011	0.05	0	0.98	21.57	0.59	0.055	0.001	0.51	307	8	292	5	400	29	0.95	292	5
MDZ5-104	577	243	0.344	0.019	0.05	0	0.92	21.51	1.19	0.054	0.001	0.45	300	13	293	15	369	35	0.98	293	15
MDZ5-25	351	134	0.377	0.021	0.05	0	0.67	21.46	0.81	0.057	0.002	-0.01	324	15	294	9	493	50	0.91	294	9
MDZ5-83	197	267	0.335	0.011	0.05	0	0.87	21.28	0.73	0.052	0.001	0.52	294	7	296	8	281	37	1.01	296	8
MDZ5-26	342	172	0.406	0.022	0.05	0	0.83	19.57	0.63	0.057	0.002	0.23	346	15	321	8	498	64	0.93	321	8
MDZ5-33	1083	347	0.42	0.019	0.05	0	0.91	18.8	0.77	0.057	0.001	0.37	356	12	334	11	506	31	0.94	334	11
MDZ5-2	486	45	0.409	0.012	0.05	0	0.9	18.36	0.48	0.054	0.001	0.12	348	7	342	6	381	21	0.98	342	6
MDZ5-31	960	444	0.434	0.013	0.06	0	0.9	17.54	0.51	0.055	0.001	0.34	366	7	357	7	397	21	0.98	357	7
MDZ5-43	300	172	0.449	0.016	0.06	0	0.82	17.24	0.59	0.056	0.001	0.12	376	9	364	10	444	35	0.97	364	10
MDZ5-33	496	210	0.457	0.013	0.06	0	0.9	16.92	0.48	0.055	0.001	0.14	382	7	370	7	425	22	0.97	370	7
MDZ5-68	1314	1433	0.475	0.016	0.06	0	0.95	16.56	0.47	0.058	0.001	0.47	395	9	378	7	523	20	0.96	378	7
MDZ5-78	1130	70	0.468	0.039	0.06	0	1	16.37	1.2	0.055	0.001	0.31	389	27	382	26	428	26	0.98	382	26
MDZ5-70	385	112	0.464	0.015	0.06	0	0.95	16.18	0.49	0.055	0.001	-0.32	387	8	387	8	401	21	1	387	8
MDZ5-58	661	238	0.492	0.013	0.06	0	0.89	15.8	0.42	0.057	0.001	0.12	406	6	396	7	473	19	0.97	396	7
MDZ5-60	805	241	0.533	0.015	0.07	0	0.89	14.99	0.42	0.058	0.001	0.1	434	8	416	8	523	22	0.96	416	8
MDZ5-14	597	52	0.577	0.034	0.07	0	0.93	14.9	0.87	0.061	0.001	0.37	462	20	418	23	653	27	0.9	418	23
MDZ5-69	232	53	0.509	0.016	0.07	0	0.87	14.86	0.41	0.055	0.001	-0.16	417	8	420	8	414	29	1.01	420	8
MDZ5-32	280	192	0.523	0.017	0.07	0	0.91	14.77	0.49	0.055	0.001	-0.23	427	10	422	11	409	31	0.99	422	11
MDZ5-30	163	53	0.524	0.025	0.07	0	0.9	14.73	0.66	0.056	0.001	0.56	427	15	423	16	474	33	0.99	423	16
MDZ5-41	231	217	0.516	0.016	0.07	0	0.84	14.75	0.47	0.056	0.001	0.32	423	8	423	10	438	34	1	423	10
MDZ5-7	356	270	0.56	0.015	0.07	0	0.83	14.53	0.36	0.059	0.001	-0.11	451	7	429	6	569	25	0.95	429	6
MDZ5-89	272	94	0.524	0.023	0.07	0	0.95	14.51	0.64	0.055	0.001	0.42	427	14	429	16	415	26	1	429	16
MDZ5-79	129	155	0.552	0.02	0.07	0	0.71	14.37	0.42	0.057	0.002	0.11	446	11	434	9	500	38	0.97	434	9
MDZ5-58	251	220	0.562	0.019	0.07	0	0.89	13.7	0.46	0.055	0.001	0.56	453	10	454	12	427	32	1	454	12
MDZ5-67	132	133	0.58	0.021	0.07	0	0.64	13.4	0.33	0.056	0.002	-0.05	464	11	464	7	455	52	1	464	7
MDZ5-63	656	1226	0.588	0.02	0.07	0	0.92	13.39	0.42	0.056	0.001	0.52	469	10	465	11	464	24	0.99	465	11
MDZ5-17	278	77	0.668	0.043	0.08	0.01	0.99	13.05	0.92	0.061	0.001	0.56	518	25	476	31	652	29	0.92	476	31
MDZ5-37	163	200	0.598	0.022	0.08	0	0.79	13.02	0.41	0.057	0.002	-0.15	476	11	477	11	475	44	1	477	11
MDZ5-75	251	119	0.602	0.025	0.08	0	0.96	12.99	0.54	0.057	0.001	0.44	483	16	478	17	500	19	0.99	478	17
MDZ5-10	664	59	0.722	0.025	0.08	0	0.97	11.78	0.37	0.061	0.001	0.34	552	11	525	12	644	15	0.95	525	12
MDZ5-45	266	143	0.758	0.03	0.09	0	0.96	10.99	0.37	0.061	0.001	-0.48	572	15	561	15	623	22	0.98	561	15
MDZ5-44	14	38	0.83	0.039	0.09	0	0.46	10.57	0.36	0.064	0.003	0.11	612	19	583	15	723	99	0.95	583	15
MDZ5-73	259	237	0.782	0.021	0.1	0	0.83	10.47	0.28	0.06	0.001	0.16	587	8	588	10	606	24	1	588	10
MDZ5-74	167	194	0.831	0.036	0.1	0	0.83	10.47	0.47	0.063	0.002	0.4	614	18	588	22	714	55	0.96	588	22
MDZ5-76	323	332	0.887	0.073	0.1	0	0.73	10.18	0.36	0.066	0.004	0.36	655	42	604	17	780	120	0.92	604	17
MDZ5-35	458	182	0.871	0.04	0.1	0	0.98	9.94	0.48	0.064	0.001	0.37	636	20	618	26	741	23	0.97	618	26
MDZ5-49	143	143	0.86	0.033	0.1	0	0.86	9.89	0.31	0.062	0.002	0.47	630	15	621	15	671	36	0.99	621	15
MDZ5-23	345	317	0.892	0.03	0.1	0	0.96	9.71	0.31	0.063	0.001	0.55	647	13	632	15	708	19	0.98	632	15
MDZ5-55	39	48	0.918	0.037	0.11	0	0.48	9.51	0.26	0.065	0.002	0.08	661	17	645	11	749	64	0.98	645	11
MDZ5-56	90	52	0.939	0.052	0.11	0	0.86	9.49	0.29	0.063	0.002	0.41	671	25	646	15	691	53	0.96	646	15
MDZ5-78	97	88	0.9	0.027	0.11	0	0.68	9.29	0.27	0.061	0.002	0.23	651	10	659	13	652	38	1.01	659	13
MDZ5-48	333	75	0.992	0.032	0.11	0	0.85	8.81	0.26	0.063	0.001	0.5	700	13	693	14	695	25	0.99	693	14
MDZ5-12	88	38	1.37	0.192	0.13	0	0.56	7.54	0.2	0.074	0.01	0.21	869	74	803	14	1000	220	0.92	803	14
MDZ5-40	119	56	1.421	0.037	0.14	0.01	0.27	7.03	0.28	0.072	0.002	0.42	898	10	857	28	995	46	0.95	857	28
MDZ5-8	490	22	1.696	0.1	0.16	0.01	0.97	6.33	0.39	0.077	0.002	0.46	1005	35	946	51	1117	33	0.94	946	51
MDZ5-32	593	230	1.646	0.05	0.16	0	0.99	6.32	0.19	0.076	0.002	0.5	988	14	947	19	1093	10	0.96	947	19
MDZ5-74	34	10	1.557	0.053	0.16	0	0.58	6.16	0.18	0.07	0.002	0.13	952	17	970	18	926	48	1.02	970	18
MDZ5-72	574	59	1.8	0.116	0.16	0.01	0.98	6.08	0.35	0.079	0.002	0.48	1043	40	982	49	1172	22	0.94	982	49
MDZ5-62	510	43	1.783	0.059	0.17	0.01	0.96	5.79	0.18	0.075	0.002	-0.08	1038	17	1026	23	1067	15	0.99	1026	23
MDZ5-66	348	122	1.827	0.058	0.17	0	0.98	5.78	0.16	0.076	0.002	0.48	1055	16	1029	19	1097	14	0.98	1029	19
MDZ5-64	287	114	2.034	0.082	0.18	0.01	0.97	5.48	0.24	0.081	0.002	0.47	1126	24	1080	38	1211	17	0.96	1080	38
MDZ5-80	231	117	1.918	0.062	0.18	0.01	0.94	5.43	0.17	0.076	0.002	-0.09	1086	17	1089	24	1082	15	1	1089	24
MDZ5-84	1238	349	1.98	0.052	0.18	0	0.97	5.41	0.14	0.077	0.002	0.54	1108	11	1093	16	1129	9	0.99	1093	16
MDZ5-103	154	66	2.06	0.127	0.19	0.01	1	5.24	0.29	0.078	0.002	0.52	1133	39	1127	54	1147	14	0.99	1127	54
MDZ5-36	521	192	2.288	0.072	0.2	0.01	0.84	5.11	0.17	0.085	0.002	0.42	1208	17	1151	29	1311	17	0.95	1151	29
MDZ5-42	120	81	2.54	0.121	0.21	0.01	0.85	4.67	0.19	0.086	0.002	0.35	1281	31	1251	42	1346	31	0.93	1346	31
MDZ5-28	102	69	2.99	0.125	0.23	0.01	0.97	4.27	0.18	0.09	0.002	-0.14	1402	29	1366	47	1418	19	0.96	1418	19
MDZ5-65	414	309	3.04	0.109	0.24	0.01	0.97	4.22	0.14	0.093	0.002	-0.35	1416	23	1371	31	1478	14	0.93	1478	14
MDZ5-9	142	70	3.286	0.082	0.26	0.01	0.87	3.91	0.1	0.093	0.002	-0.05	1480	12	1467	20	1480	15	0.99	1480	15
MDZ5-105	176	190	3.181	0.078	0.25	0.01	0.96	4.02	0.1	0.093	0.002	0.41	1452	11	1433	17	1485	7	0.97	1485	7
MDZ5-59	614	393	3.349	0.098	0.25	0.01	0.97	3.97	0.12	0.097	0.002	-0.13	1496	18	1447	28	1565	11	0.92	1565	11
MDZ5-51	196	80	3.813	0.111	0.28	0.01	0.74	3.57	0.1	0.098	0.002	0.5	1595	17	1590	27	1588	28	1	1588	28
MDZ5-53	451	273	3.6	0.118	0.25	0.01	0.92	3.93	0.11	0.1	0.002	0.47	1549	21	1463	27	1632	20	0.9	1632	20
MDZ5-57	530	83	4.2	0.138	0.29	0.01	0.96	3.49	0.13	0.107	0.002	0.55	1672	21	1624	45	1746	16	0.93	1746	16
MDZ5-53	186	82	4.44	0.237	0.3	0.02	0.97	3.31	0.17	0.107	0.002	-0.14	1718	41	1700	71	1751	21	0.97	1751	21
MDZ5-16	537	68	4.449	0.12	0.3	0.01	0.98	3.33	0.09	0.107	0.002	0.44	1721	15	1693	29	1754	9	0.97	1754	9
MDZ5-86	271	100	4.587	0.133	0.31	0.01	0.98	3.25	0.11	0.109	0.002	0.48	1752	20	1730	41	1775	12	0.97	1775	12
MDZ5-2	302	160	4.512	0.128	0.3	0.01	0.98	3.37	0.09	0.109	0.002	0.43	1733	17	1676	29	1787	11	0.94	1787	11
MDZ5-61	651	111	4.72	0.212	0.31	0.01	0.98	3.24	0.12	0.11	0.002	-0.54	1769	35	1735	51	1802	17	0.96	1802	17
MDZ5-106	239	112	4.65	0.239	0.3	0.01	0.99	3.32	0.16	0.112	0.003	0.4	1757	40	1697	65	1832	22	0.93	1832	22
MDZ5-29	355	339	5.164	0.127	0.33	0.01	0.83	3.01	0.07	0.113	0.002	0.45	1847	12	1852	19	1853	16	1	1853	16
MDZ5-8	139	34	5.36	0.146	0.34	0.01	0.95	2.96	0.08	0.115	0.002	-0.31	1878	16	1879	31	1875	9	1	1875	9
MDZ5-77	102	29	7.88	0.232	0.38	0.01	0.97	2.66	0.08	0.152	0.003	0.13	2217	19	2060	36	2368	11	0.87	2368	11
MDZ5-87	231	93	11.65	0.862	0.44	0.03	1	2.26	0.14	0.187	0.005	-0.91	2563	69	2360	120	2714	26	0.87	2714	26
MDZ5-5	81	109	14.22	0.61	0.53	0.02	1	1.9	0.08	0.194	0.004	0.49	2762	37	2718	81	2777	6	0.98	2777	6
MDZ5-38	214	89	14.89	0.437	0.54	0.02	0.9	1.84	0.05	0.198	0.004	0.57	2807	20	2801	51	2811	12	1	2811	12
MDZ5-15	7	27	22.4	1.855	0.4	0.03	0.97	2.48	0.16	0.412	0.011	0.55	3189	77	2180	120	3951	26	0.55	3951	26
discarded grains
MDZ5-94	140	67	0.291	0.03	0.04	0	0.97	24.69	2.25	0.051	0.002	0.59	259	23	256	22	258	51	0.99	256	22	0.0859375
MDZ5-21	34	249	10.4	2.11	0.1	0.02	1	10	1.91	0.753	0.019	0.24	2430	180	610	110	4856	26	0.25
MDZ5-34	76	85	0.669	0.028	0.04	0	0.73	25.19	0.86	0.125	0.004	0.47	520	15	251	7	2023	52	0.48
MDZ5-98	58	54	0.294	0.033	0.04	0	0.93	25.84	2.13	0.057	0.002	0.17	261	25	245	19	483	71	0.938697
MDZ5-27	266	96	0.35	0.019	0.04	0	0.98	24.04	1.36	0.062	0.002	0.29	305	13	263	13	687	31	0.86
MDZ5-95	52	42	0.406	0.024	0.04	0	0.66	23.09	0.79	0.066	0.003	0.32	346	16	273	8	810	85	0.79
MDZ5-13	273	137	0.59	0.049	0.05	0	0.37	21.74	0.91	0.096	0.01	0.2	470	30	290	10	1510	180	0.62
MDZ5-55	54	55	0.39	0.032	0.05	0	0.74	21.6	0.86	0.059	0.004	0.4	334	23	292	10	610	150	0.87
MDZ5-61	343	200	0.449	0.049	0.05	0	0.82	20.45	0.82	0.066	0.006	0.37	375	33	307	10	830	210	0.82
MDZ5-22	302	208	0.435	0.031	0.05	0	0.69	20.2	0.7	0.064	0.004	0.26	366	21	312	8	720	120	0.85
MDZ5-45	96	49	0.74	0.131	0.05	0	0.92	18.48	1.19	0.098	0.013	0.21	557	78	339	20	1530	250	0.61
MDZ5-62	73	137	0.608	0.033	0.05	0	0.77	18.32	0.74	0.081	0.004	0.38	482	20	343	12	1205	91	0.71
MDZ5-19	590	189	0.578	0.026	0.05	0	0.84	18.42	0.57	0.076	0.002	0.5	463	15	341	8	1105	47	0.74
MDZ5-60	161	172	0.52	0.16	0.06	0.01	1	17.24	3.58	0.061	0.006	0.52	410	100	362	72	570	220	0.88
MDZ5-15	116	75	0.512	0.044	0.06	0	0.9	17.06	0.86	0.062	0.003	0.45	427	25	367	17	688	90	0.86
MDZ5-43	401	58	1.07	0.241	0.08	0	0.94	12.95	0.6	0.098	0.019	0.07	720	120	479	19	1440	390	0.67
MDZ5-25	1940	1840	0.902	0.036	0.09	0	0.74	10.82	0.35	0.07	0.002	0.46	653	16	570	14	913	57	0.87
MDZ5-41	484	94	1.206	0.043	0.11	0	0.64	8.97	0.36	0.079	0.003	0.25	803	17	682	22	1159	67	0.85
MDZ5-100	1310	39	2.2	0.224	0.16	0.01	0.99	6.29	0.57	0.097	0.002	0.47	1173	66	947	77	1564	25	0.81
MDZ5-70	817	68	3.4	0.129	0.22	0.01	0.93	4.6	0.17	0.114	0.003	0.49	1504	26	1267	34	1860	21	0.68
MDZ5-92	137	71	3.174	0.091	0.26	0.01	0.88	3.82	0.1	0.088	0.002	0.46	1450	16	1499	24	1381	21	1.09
MDZ5-46	170	107	3.64	0.149	0.28	0.01	0.93	3.57	0.12	0.094	0.002	0.42	1557	28	1593	37	1497	32	1.06
MDZ5-3	289	63	3.87	0.178	0.29	0.01	0.95	3.41	0.15	0.095	0.002	0.45	1605	34	1656	56	1520	28	1.09
MDZ5-16	472	72	4.983	0.118	0.34	0.01	0.96	2.94	0.07	0.105	0.002	0.28	1816	11	1888	25	1721	9	1.1
MDZ5-6	113	83	3.71	0.476	0.25	0.03	1	3.98	0.51	0.106	0.002	0.27	1560	110	1440	170	1726	8	0.83
MDZ5-80	300	117	4.02	0.197	0.27	0.01	0.98	3.75	0.18	0.109	0.002	0.53	1648	32	1524	60	1783	14	0.85
MDZ5-82	215	99	3.79	0.125	0.25	0.01	0.94	3.98	0.12	0.109	0.003	0.43	1590	21	1456	33	1785	24	0.82
MDZ5-93	301	47	5.76	0.159	0.38	0.01	0.98	2.63	0.07	0.11	0.002	0.45	1939	16	2076	28	1795	7	1.16
MDZ5-85	353	96	5.99	0.184	0.39	0.01	0.99	2.54	0.07	0.11	0.002	0.57	1974	21	2141	39	1797	10	1.19
MDZ5-18	527	196	3.76	0.159	0.24	0.01	0.97	4.12	0.19	0.112	0.003	0.65	1583	31	1401	52	1830	21	0.77
MDZ5-99	414	208	4.15	0.171	0.26	0.01	0.96	3.79	0.19	0.113	0.003	0.38	1663	31	1510	60	1841	25	0.82
MDZ5-71	823	175	4.22	0.172	0.27	0.01	0.95	3.73	0.12	0.115	0.003	0.51	1677	28	1532	36	1885	25	0.81
MDZ5-28	1010	138	4.09	0.162	0.25	0.01	0.87	3.94	0.14	0.118	0.003	0.47	1652	28	1458	39	1928	24	0.76
MDZ5-77	102	29	7.88	0.232	0.38	0.01	0.97	2.66	0.08	0.152	0.003	0.13	2217	19	2060	36	2368	11	0.87
MDZ5-15	7	27	22.4	1.855	0.4	0.03	0.97	2.48	0.16	0.412	0.011	0.55	3189	77	2180	120	3951	26	0.55
MDZ5-87	231	93	11.65	0.862	0.44	0.03	1	2.26	0.14	0.187	0.005	-0.91	2563	69	2360	120	2714	26	0.87
MDZ5-37	27	3	7.5	1.806	0.29	0.04	0.9	3.45	0.49	0.182	0.022	0.43	2110	220	1630	210	2630	220	0.62
MDZ5-52	338	58	10.14	0.991	0.39	0.02	0.96	2.56	0.16	0.186	0.008	0.5	2470	110	2130	110	2704	68	0.79
MDZ5-4	382	64	22.9	1.284	0.58	0.03	0.99	1.72	0.09	0.282	0.006	0.57	3221	53	2950	120	3376	9	0.87
MDZ9
MDZ9-9	298	304	0.2739	0.00873204	0.03985	0.000962709	0.76102	25.0941	0.606231	0.05068	0.00133577	0.407841	245.7	5.4	251.9	3.4	225	40	1.02523	251.9	3.4
MDZ9-70	396.4	261.5	0.2871	0.00688553	0.04026	0.000908156	0.073255	24.8386	0.56029	0.05172	0.00129552	0.506603	256.3	3	254.5	2.6	272	35	0.992977	254.5	2.6
MDZ9-67	382	266	0.2926	0.00830999	0.0403	0.000948491	0.77405	24.8139	0.584014	0.05257	0.00126868	0.501579	260.6	4.6	254.7	3.1	309	31	0.97736	254.7	3.1
MDZ9-18	430.5	365	0.2894	0.00703569	0.04034	0.000883474	0.23504	24.7893	0.542903	0.05228	0.00124727	0.511713	258.1	3.1	255	2.2	297	30	0.987989	255	2.2
MDZ9-131	972	290	0.289	0.00625847	0.0404	0.000865427	0.51737	24.7525	0.530234	0.05139	0.00111802	0.5034	257.8	1.9	255.3	1.9	258	20	0.990303	255.3	1.9
MDZ9-45	483	390	0.2856	0.00686054	0.04048	0.00097875	0.76527	24.7036	0.597298	0.05136	0.00110975	0.455897	255.1	3	255.8	3.4	257	19	1.00274	255.8	3.4
MDZ9-16	372	378	0.2855	0.00685887	0.04053	0.00089525	0.39891	24.6731	0.544993	0.05154	0.00128068	0.436981	255	3	256.1	2.4	264	34	1.00431	256.1	2.4
MDZ9-50	889	340.6	0.2881	0.00690222	0.04057	0.000913657	0.5336	24.6488	0.555103	0.05155	0.00116386	0.421425	257.1	3	256.3	2.6	273	27	0.996888	256.3	2.6
MDZ9-47	355	231	0.2935	0.007842	0.04069	0.00100517	0.70881	24.5761	0.607107	0.05235	0.00125392	0.484137	261.3	4	257.1	3.7	300	29	0.983927	257.1	3.7
MDZ9-121	899	186	0.2885	0.00725623	0.0407	0.000925309	0.95482	24.57	0.558596	0.05103	0.00107895	0.559434	257.3	3.5	257.2	2.8	242	16	0.999611	257.2	2.8
MDZ9-117	881	264.8	0.2901	0.00699094	0.0408	0.000913212	0.8945	24.5098	0.548594	0.05127	0.00106562	0.593174	258.6	3.1	257.8	2.6	253	13	0.996906	257.8	2.6
MDZ9-15	444	116.2	0.2882	0.00796704	0.0408	0.00108824	0.81581	24.5098	0.653736	0.05166	0.00126507	0.38159	257.1	4.3	257.8	4.4	275	31	1.00272	257.8	4.4
MDZ9-7	1137	545	0.2835	0.00682561	0.04082	0.000947053	0.74212	24.4978	0.568366	0.05112	0.00109786	0.450724	253.4	3	257.9	3	246	18	1.01776	257.9	3
MDZ9-103	444	333.5	0.2858	0.00670244	0.04085	0.000877433	0.58711	24.4798	0.525811	0.05045	0.00113973	0.399363	255.3	2.8	258.1	2	215	24	1.01097	258.1	2
MDZ9-137	256.7	124.5	0.2912	0.00787458	0.04086	0.000947742	0.78323	24.4738	0.567667	0.0513	0.00115481	0.435272	259.5	4.1	258.2	3	254	24	0.99499	258.2	3
MDZ9-3	267	303	0.291	0.0124448	0.0409	0.00137081	0.94239	24.4499	0.819466	0.05166	0.00122066	0.494834	259.2	8.5	258.3	6.9	270	29	0.996528	258.3	6.9
MDZ9-125	463	252.5	0.2897	0.00798877	0.04096	0.000986706	0.91619	24.4141	0.588123	0.05118	0.00111025	0.406731	258.3	4.4	258.8	3.4	248	19	1.00194	258.8	3.4
MDZ9-48	991	354	0.2923	0.00737738	0.0411	0.000967359	0.94055	24.3309	0.57267	0.05173	0.00110567	0.464753	260.4	3.6	259.6	3.2	273	17	0.996928	259.6	3.2
MDZ9-138	348	500	0.2879	0.0080321	0.0411	0.00121152	0.91358	24.3309	0.717212	0.05019	0.00109202	0.464322	256.8	4.4	259.6	5.5	203	20	1.0109	259.6	5.5
MDZ9-27	623	320	0.2983	0.00765723	0.04125	0.00105652	0.79609	24.2424	0.620909	0.05186	0.00118835	0.312473	265.1	3.7	260.6	4.1	279	25	0.983025	260.6	4.1
MDZ9-128	451	195	0.2916	0.00670091	0.04126	0.00096486	0.67185	24.2366	0.566769	0.05107	0.00115072	0.525841	259.8	2.6	260.6	3.1	243	24	1.00308	260.6	3.1
MDZ9-7	432	288	0.2913	0.00872882	0.04142	0.00104683	0.83056	24.1429	0.610175	0.05182	0.00123957	-0.31183	259.5	5.1	261.6	4	282	31	1.00809	261.6	4
MDZ9-49	606	640	0.2971	0.00837361	0.04151	0.00099037	0.88267	24.0906	0.574767	0.0521	0.00117825	0.497772	264.1	4.6	262.2	3.3	289	24	0.992806	262.2	3.3
MDZ9-55	375	190.3	0.302	0.00816894	0.04152	0.0010129	0.7509	24.0848	0.587559	0.05259	0.00115203	0.456785	268	4.3	262.3	3.6	311	20	0.978731	262.3	3.6
MDZ9-133	286	157.1	0.2931	0.00913034	0.04155	0.00103085	0.93844	24.0674	0.597111	0.05119	0.00115285	0.453568	261	5.5	262.4	3.8	249	24	1.00536	262.4	3.8
MDZ9-8	315.4	533	0.2887	0.0106089	0.04155	0.0011329	0.84391	24.0674	0.65622	0.0513	0.00143272	-0.3786	257.4	7	262.4	4.8	258	43	1.01943	262.4	4.8
MDZ9-79	396	93.1	0.2883	0.00669378	0.04156	0.000901883	0.71671	24.0616	0.522155	0.05093	0.00118729	0.364101	257.2	2.7	262.5	2.1	237	28	1.02061	262.5	2.1
MDZ9-111	395	353.7	0.2934	0.00633983	0.04159	0.000902436	0.64615	24.0442	0.521721	0.05099	0.00112712	0.375788	261.2	1.9	262.7	2.2	240	22	1.00574	262.7	2.2
MDZ9-126	347	198.8	0.3041	0.00739126	0.04162	0.000899161	0.514	24.0269	0.519079	0.05259	0.00122094	0.459335	269.6	3.3	262.9	2.1	310	27	0.975148	262.9	2.1
MDZ9-78	3264	3180	0.3067	0.00711238	0.0419	0.00097583	0.95697	23.8664	0.555835	0.05313	0.00108514	0.496718	271.6	2.8	264.6	3.1	334.2	9.2	0.974227	264.6	3.1
MDZ9-1	314	184.3	0.2932	0.00882873	0.04191	0.0010607	0.66811	23.8606	0.603888	0.05151	0.00123992	0.16606	261	5.2	264.7	4	262	31	1.01418	264.7	4
MDZ9-72	430	228	0.2997	0.00876858	0.04195	0.00100872	0.92765	23.8379	0.573202	0.05137	0.00116535	0.458084	266.1	5	264.9	3.5	257	25	0.99549	264.9	3.5
MDZ9-11	370	300	0.2932	0.00790421	0.04196	0.00114571	0.44867	23.8322	0.650736	0.0514	0.00158012	0.327704	261	4.1	265	4.8	256	53	1.01533	265	4.8
MDZ9-11	471	161.2	0.2961	0.00843031	0.042	0.00115313	0.81209	23.8095	0.6537	0.05178	0.00124441	0.058292	263.3	4.7	265.2	4.9	274	31	1.00722	265.2	4.9
MDZ9-88	317	140	0.2986	0.00687203	0.04202	0.000958056	0.74956	23.7982	0.542599	0.05121	0.00110322	0.524406	265.3	2.7	265.3	2.9	250	19	1	265.3	2.9
MDZ9-113	319	253.9	0.3051	0.00735149	0.04204	0.000939864	0.75833	23.7869	0.531789	0.05206	0.00108926	0.451856	270.4	3.2	265.5	2.6	288	14	0.981879	265.5	2.6
MDZ9-4	440	258	0.2959	0.00794435	0.04213	0.000904917	0.5991	23.7361	0.509831	0.05129	0.00124188	0.483767	263.2	4.2	266	2	253	32	1.01064	266	2
MDZ9-107	544	194	0.321	0.0154018	0.04218	0.0012705	0.96748	23.7079	0.714102	0.0548	0.00170036	0.487008	282	11	266.3	5.9	418	46	0.944326	266.3	5.9
MDZ9-56	298	189	0.2997	0.0109803	0.0423	0.00107299	0.69651	23.6407	0.599676	0.0514	0.00150558	0.308883	266.1	7.2	267.1	4.1	272	44	1.00376	267.1	4.1
MDZ9-74	467.3	368	0.3013	0.00802513	0.04231	0.000931748	0.64758	23.6351	0.52049	0.05163	0.00126458	0.373187	267.4	4.1	267.2	2.4	268	32	0.999252	267.2	2.4
MDZ9-14	433	264	0.2963	0.00879588	0.04235	0.00102655	0.83977	23.6127	0.572366	0.05175	0.00119634	-0.24777	263.4	5.1	267.4	3.6	279	28	1.01519	267.4	3.6
MDZ9-129	1233	226.1	0.3045	0.00654585	0.04244	0.000938329	0.92251	23.5627	0.52096	0.0515	0.00104738	0.441555	269.9	1.9	267.9	2.5	263.2	8.6	0.99259	267.9	2.5
MDZ9-62	804	520	0.3033	0.00761291	0.04268	0.00093034	0.73132	23.4302	0.510732	0.05202	0.00115868	0.479143	269	3.6	269.4	2.3	286	22	1.00149	269.4	2.3
MDZ9-85	120.9	100.8	0.3087	0.00994778	0.04269	0.00101023	0.33263	23.4247	0.554332	0.0527	0.00159716	0.485469	273.1	6	269.5	3.3	315	53	0.986818	269.5	3.3
MDZ9-4	211.7	97.3	0.2934	0.00905778	0.04269	0.0010915	0.44449	23.4247	0.598924	0.0506	0.00156976	0.099437	261.1	5.5	269.5	4.2	220	53	1.03217	269.5	4.2
MDZ9-127	720	401	0.3056	0.00680856	0.04283	0.000889586	0.6838	23.3481	0.484944	0.05155	0.00112096	0.472984	270.7	2.4	270.4	1.5	265	20	0.998892	270.4	1.5
MDZ9-60	301.4	174.4	0.3068	0.00901169	0.0431	0.000963298	0.5498	23.2019	0.518569	0.05235	0.00129376	0.434304	271.6	5.1	272	2.7	300	33	1.00147	272	2.7
MDZ9-2	243.6	142.8	0.3079	0.00812471	0.04319	0.00104046	0.62875	23.1535	0.557773	0.05192	0.0014347	-0.033201	272.5	4.1	272.6	3.6	278	44	1.00037	272.6	3.6
MDZ9-87	654	334	0.3121	0.00763692	0.04324	0.00108184	0.94918	23.1267	0.578618	0.05203	0.00110442	0.486163	275.8	3.4	272.9	4	286	16	0.989485	272.9	4
MDZ9-13	805	661	0.305	0.00920978	0.0434	0.00117368	0.9111	23.0415	0.623118	0.05204	0.00122183	-0.28257	270.2	5.3	273.9	4.9	286	28	1.01369	273.9	4.9
MDZ9-30	486	285	0.3126	0.0100746	0.04349	0.00124445	0.9599	22.9938	0.657958	0.05142	0.00107411	0.467606	276.1	6.2	274.4	5.5	260	14	0.993843	274.4	5.5
MDZ9-13	282	218	0.2994	0.0099928	0.0435	0.001086	0.80765	22.9885	0.573921	0.05082	0.00132498	0.487904	265.9	6.2	274.5	4	231	39	1.03234	274.5	4
MDZ9-12	462	228.8	0.3098	0.00828495	0.04364	0.00103701	0.78657	22.9148	0.544517	0.05227	0.0012808	0.01415	274	4.3	275.4	3.5	302	31	1.00511	275.4	3.5
MDZ9-46	448	223.3	0.3143	0.008553	0.04371	0.000969859	0.76242	22.8781	0.507629	0.05238	0.00126553	0.444721	277.5	4.5	275.8	2.6	301	31	0.993874	275.8	2.6
MDZ9-3	806	478	0.3079	0.00812471	0.04381	0.00111527	0.83862	22.8258	0.581077	0.05167	0.00122083	0.09026	272.5	4.1	276.4	4.2	269	29	1.01431	276.4	4.2
MDZ9-16	372	202	0.3061	0.00803236	0.04382	0.00110927	0.73176	22.8206	0.577686	0.05117	0.00119656	0.12901	271.1	4.1	276.5	4.2	254	26	1.01992	276.5	4.2
MDZ9-1	273	248	0.3052	0.00870051	0.04385	0.00101451	0.51498	22.805	0.527615	0.05042	0.00139229	0.511332	270.4	4.8	276.6	3.1	213	44	1.02293	276.6	3.1
MDZ9-38	986	376	0.3189	0.00752854	0.04387	0.000948383	0.88358	22.7946	0.492775	0.05237	0.00113998	0.461913	281	3.1	276.8	2.3	301	20	0.985053	276.8	2.3
MDZ9-96	249	71.7	0.3062	0.00771967	0.04405	0.00104931	0.81595	22.7015	0.540772	0.05018	0.00109184	0.479373	271.2	3.7	277.9	3.5	203	20	1.02471	277.9	3.5
MDZ9-101	670	430.2	0.3145	0.00745413	0.04408	0.000944891	0.84752	22.686	0.486294	0.05148	0.0011318	0.39532	277.7	3.1	278.1	2.1	262	21	1.00144	278.1	2.1
MDZ9-22	563	180.5	0.3236	0.00882535	0.04413	0.00117127	0.82533	22.6603	0.601438	0.05298	0.00120795	0.488462	284.6	4.6	278.4	4.8	327	25	0.978215	278.4	4.8
MDZ9-114	482	191.9	0.3151	0.00746426	0.04416	0.0010352	0.88663	22.6449	0.530844	0.05107	0.0010898	0.524864	278.1	3.1	278.6	3.4	244	17	1.0018	278.6	3.4
MDZ9-92	387.7	96.5	0.3181	0.008745	0.0442	0.00106839	0.91374	22.6244	0.546871	0.05183	0.00114658	0.342274	280.4	4.6	278.8	3.7	278	22	0.994294	278.8	3.7
MDZ9-94	336	187.2	0.3145	0.00740095	0.04439	0.00104436	0.84297	22.5276	0.530005	0.05113	0.00115642	0.538151	277.6	3	280	3.4	246	24	1.00865	280	3.4
MDZ9-86	940	430	0.3179	0.0112656	0.0445	0.00149402	0.98595	22.4719	0.754461	0.05166	0.00108771	0.486022	280.2	7.1	280.5	7.6	270	15	1.00107	280.5	7.6
MDZ9-10	495	240	0.3089	0.00889537	0.0445	0.001114	0.8743	22.4719	0.562556	0.05102	0.00118373	-0.29039	273.3	4.9	280.6	4.1	240	27	1.02671	280.6	4.1
MDZ9-17	172.1	199.8	0.34	0.0129321	0.04452	0.00103112	0.31735	22.4618	0.520235	0.0557	0.00211684	0.357666	297.1	8.5	280.8	3.2	437	72	0.945136	280.8	3.2
MDZ9-93	405	203	0.3154	0.00792659	0.04454	0.00102646	0.75294	22.4517	0.517419	0.05079	0.0011235	0.387381	278.3	3.7	280.9	3.2	231	22	1.00934	280.9	3.2
MDZ9-115	405.9	235.4	0.3235	0.00726298	0.04456	0.000940339	0.65901	22.4416	0.473581	0.0521	0.00110913	0.34142	284.6	2.6	281	1.9	290	17	0.987351	281	1.9
MDZ9-26	463	371	0.3252	0.00768843	0.04461	0.000958395	0.81178	22.4165	0.481593	0.05241	0.00120284	0.413009	285.9	3.1	281.4	2.2	303	26	0.98426	281.4	2.2
MDZ9-20	828	368	0.3191	0.00764002	0.04472	0.000975731	0.89997	22.3614	0.487895	0.052	0.0010824	0.570397	281.2	3.2	282	2.4	285	13	1.00284	282	2.4
MDZ9-90	601	396	0.3161	0.00758997	0.04476	0.00100647	0.80895	22.3414	0.502367	0.05114	0.00111343	0.536072	278.9	3.2	282.3	2.8	247	20	1.01219	282.3	2.8
MDZ9-136	449	68.7	0.3422	0.00792719	0.04481	0.00103613	0.74325	22.3164	0.51602	0.05495	0.00121581	0.467597	298.8	3.1	282.6	3.2	410	21	0.945783	282.6	3.2
MDZ9-28	431	506	0.3254	0.00712489	0.04504	0.000998169	0.40246	22.2025	0.492048	0.05181	0.00110028	0.455875	286	2.2	284	2.7	277	16	0.993007	284	2.7
MDZ9-39	257	134	0.3264	0.00750365	0.04525	0.00115027	0.89779	22.0995	0.561776	0.0524	0.00124387	0.506627	286.8	2.8	285.3	4.4	302	29	0.99477	285.3	4.4
MDZ9-59	959	248.4	0.3266	0.00942905	0.04527	0.00124874	0.86936	22.0897	0.609327	0.05289	0.00117433	0.485944	286.9	5.3	285.4	5.3	324	22	0.994772	285.4	5.3
MDZ9-110	294	210	0.3351	0.00892899	0.04634	0.00104836	0.53361	21.5796	0.488201	0.05238	0.00123287	0.432533	293.5	4.5	292	3	301	28	0.994889	292	3
MDZ9-68	395	255	0.3458	0.0107271	0.04707	0.0013233	0.63515	21.2449	0.597271	0.0538	0.00153876	0.435235	301.5	6.2	296.5	5.8	361	47	0.983416	296.5	5.8
MDZ9-6	283.1	152.9	0.3371	0.0119777	0.04723	0.00130471	0.65619	21.173	0.584895	0.0533	0.00184021	0.14783	294.8	7.5	297.5	5.5	337	62	1.00916	297.5	5.5
MDZ9-66	338	246	0.3631	0.0121172	0.04894	0.00130294	0.93629	20.4332	0.543996	0.05409	0.00141364	0.516796	314.5	7.2	308	5.3	374	37	0.979332	308	5.3
MDZ9-2	213	628	0.371	0.0124522	0.05023	0.0012131	0.63769	19.9084	0.480808	0.0534	0.00153317	0.454773	320.5	7.4	316	4.2	344	45	0.985959	316	4.2
MDZ9-5	93	240	0.366	0.013213	0.0504	0.001492	0.49371	19.8413	0.587365	0.0541	0.00193151	0.13019	316.6	8.3	317.1	6.5	384	64	1.00158	317.1	6.5
MDZ9-98	189	123	0.418	0.0369579	0.0507	0.00189425	0.82026	19.7239	0.736923	0.0595	0.00455808	0.697268	353	25	319	10	610	160	0.903683	319	10
MDZ9-73	184	111	0.444	0.0399982	0.0539	0.00290725	0.95982	18.5529	1.0007	0.0593	0.00285773	0.417694	372	27	339	16	571	93	0.91129	339	16
MDZ9-81	117.8	123	0.43	0.0164305	0.0542	0.00193263	0.80752	18.4502	0.657885	0.0568	0.0015813	0.317175	363.4	9.7	340	9.6	498	52	0.935608	340	9.6
MDZ9-89	596	431	0.4029	0.00932852	0.05453	0.00120823	0.82245	18.3385	0.406328	0.05313	0.00110974	0.488027	343.8	3.4	342.3	3.2	334	14	0.995637	342.3	3.2
MDZ9-24	225.9	67.3	0.474	0.0248771	0.0599	0.00241769	0.91113	16.6945	0.673824	0.057	0.00165517	0.641385	394	15	375	13	489	45	0.951777	375	13
MDZ9-75	648	439	0.4753	0.0119856	0.06377	0.00156098	0.83284	15.6814	0.383851	0.05406	0.00112756	0.401661	394.8	5	398.5	5.4	374	14	1.00937	398.5	5.4
MDZ9-97	339.8	243.2	0.4933	0.0112955	0.0647	0.00147599	0.84156	15.4559	0.352593	0.05483	0.00117074	0.426306	407.2	3.7	404.1	4.3	405	17	0.992387	404.1	4.3
MDZ9-109	336.9	541	0.5019	0.0118512	0.06539	0.0013931	0.64096	15.2929	0.325808	0.0555	0.00123004	0.450702	413	4.2	408.3	2.9	432	21	0.98862	408.3	2.9
MDZ9-32	579	26.5	0.504	0.01492	0.0658	0.00192142	0.97143	15.1976	0.443783	0.05496	0.0011343	0.483	414.5	7.5	410.5	8.4	410	11	0.99035	410.5	8.4
MDZ9-8	700	38.8	0.4977	0.0114705	0.06693	0.00150597	0.82367	14.941	0.336182	0.05518	0.0011773	0.485775	410.1	3.9	417.6	4.2	419	17	1.01829	417.6	4.2
MDZ9-119	159.7	61.2	0.5007	0.0119386	0.06707	0.00144978	0.5438	14.9098	0.322288	0.05359	0.00115484	0.435139	412.1	4.4	418.5	3.3	353	18	1.01553	418.5	3.3
MDZ9-51	1770	1101	0.5666	0.0129172	0.0691	0.00189735	0.42009	14.4718	0.397366	0.0598	0.00169423	0.34793	455.8	4	430.9	7.8	593	42	0.945371	430.9	7.8
MDZ9-83	359	820	0.536	0.0153596	0.0699	0.00184239	0.79429	14.3062	0.377075	0.05547	0.00124273	0.427778	435.5	7.5	435.5	7.5	431	23	1	435.5	7.5
MDZ9-42	522	92.9	0.5408	0.0144619	0.0702	0.00191343	0.92875	14.245	0.388274	0.05619	0.00135666	0.458962	438.9	6.3	437.5	7.6	459	30	0.99681	437.5	7.6
MDZ9-41	354	135	0.5366	0.0113197	0.07046	0.00158706	0.85414	14.1924	0.319674	0.05571	0.00115924	0.530537	436.1	2.4	438.9	4.4	441	13	1.00642	438.9	4.4
MDZ9-44	270.2	278	0.54	0.0161443	0.07084	0.00163699	0.7742	14.1163	0.326203	0.05581	0.00139097	0.409292	438.2	7.9	441.2	5	455	28	1.00685	441.2	5
MDZ9-6	607	249	0.544	0.0210327	0.0713	0.00199837	0.92611	14.0252	0.393094	0.05623	0.00141574	0.479981	441	12	443.9	8.3	461	34	1.00658	443.9	8.3
MDZ9-17	282.1	226.1	0.572	0.0151945	0.0738	0.00190226	0.83516	13.5501	0.349266	0.05688	0.00129558	0.19936	459.4	6.6	459	7.3	486	24	0.999129	459	7.3
MDZ9-25	335	239.2	0.603	0.0192469	0.0761	0.00206797	0.90994	13.1406	0.357087	0.0568	0.00128008	0.502971	479	9.8	472.7	8.5	483	23	0.986848	472.7	8.5
MDZ9-5	230.7	101.9	0.6132	0.015212	0.07892	0.00182695	0.65105	12.6711	0.293327	0.05691	0.00129611	0.556496	485.6	5.7	489.7	5.5	488	24	1.00844	489.7	5.5
MDZ9-23	217	170	0.64	0.0182439	0.0806	0.00207088	0.75087	12.407	0.318775	0.05722	0.0013963	0.450532	502	8.2	499.8	7.6	509	27	0.995618	499.8	7.6
MDZ9-37	1350	1300	0.648	0.0169989	0.0825	0.00216391	0.97394	12.1212	0.31793	0.05701	0.00118981	0.706488	507.4	6.8	510.9	8.1	492	13	1.0069	510.9	8.1
MDZ9-35	660	980	0.729	0.0209183	0.0933	0.00252427	0.75684	10.7181	0.289983	0.05597	0.00122599	0.462544	555.6	8.5	575	10	451	20	1.03492	575	10
MDZ9-19	71.5	88.6	0.818	0.0266205	0.1001	0.00269221	0.68466	9.99001	0.268684	0.0599	0.00176782	-0.13769	607	12	615	11	597	46	1.01318	615	11
MDZ9-134	262	184.8	0.839	0.0200641	0.1002	0.00238873	0.81453	9.98004	0.23792	0.06022	0.00128926	0.449889	618.6	6	615.5	7.8	611	17	0.994989	615.5	7.8
MDZ9-12	81.3	22.2	0.9	0.0247588	0.10699	0.00235772	0.3113	9.34667	0.205971	0.0621	0.00172701	0.524004	651.8	9	655.2	5.8	675	41	1.00522	655.2	5.8
MDZ9-71	96.2	93.5	0.881	0.0289735	0.1072	0.00240972	0.75127	9.32836	0.209689	0.0598	0.00162494	0.476048	641	13	656.3	6.3	596	41	1.02387	656.3	6.3
MDZ9-19	102	77.9	1.2	0.0674166	0.1292	0.00395943	0.84216	7.73994	0.237196	0.0674	0.00292867	0.459969	799	29	783	17	844	83	0.979975	783	17
MDZ9-43	400	17.6	1.131	0.0898925	0.1304	0.00841437	0.99335	7.66871	0.494842	0.06302	0.00157233	0.468608	766	41	789	45	708	31	1.03003	789	45
MDZ9-34	215	166.8	1.322	0.051333	0.1348	0.0044976	0.97024	7.4184	0.247515	0.07105	0.00158406	0.35196	861	17	815	20	959	20	0.946574	815	20
MDZ9-64	354.2	669	1.692	0.0426749	0.1692	0.00398264	0.94107	5.91017	0.139114	0.07285	0.00151359	0.496779	1005.4	9.8	1008	12	1012.9	9.8	1.00259	1008	12
MDZ9-10	63.9	28.36	1.789	0.0486745	0.1789	0.00420025	0.71069	5.58971	0.131236	0.0741	0.00184562	0.462578	1041	12	1061	12	1044	29	1.01921	1061	12
MDZ9-118	337	114.1	1.921	0.0433139	0.1829	0.0039536	0.95088	5.46747	0.118186	0.07559	0.00153936	0.461379	1088.3	6.9	1082.9	8.1	1084	7.6	0.995038	1082.9	8.1
MDZ9-82	243	88.4	1.939	0.054999	0.185	0.00420595	0.91344	5.40541	0.122891	0.07659	0.00172812	0.440833	1094	13	1094	11	1110	21	1	1094	11
MDZ9-29	238	170	2.31	0.176166	0.199	0.0126428	0.99634	5.02513	0.319255	0.08491	0.0018148	0.227186	1229	47	1170	64	1313	15	0.951993	1170	64
MDZ9-21	67.5	34.95	2.135	0.0605994	0.1996	0.00517939	0.76235	5.01002	0.130004	0.0775	0.00184459	0.11968	1160	14	1173	18	1133	26	1.01121	1173	18
MDZ9-31	324	47.7	2.18	0.118326	0.1999	0.00858743	0.99078	5.0025	0.214901	0.0773	0.0018974	0.457458	1172	36	1175	41	1136	32	1.00256	1175	41
MDZ9-57	135.1	87.8	2.429	0.051147	0.2154	0.00459553	0.91239	4.64253	0.0990476	0.08244	0.0017065	0.50848	1251.2	4.8	1257.4	8.5	1256	10	1.00111	1256	10
MDZ9-105	264	118.3	2.719	0.0579412	0.2264	0.00491048	0.90462	4.41696	0.0958012	0.08679	0.00178356	0.46512	1333.5	5.4	1315.6	9.7	1355.7	9	0.970421	1315.6	9.7
MDZ9-84	80.6	31.9	2.844	0.0901961	0.2362	0.00680633	0.95894	4.2337	0.121998	0.0877	0.0019853	0.496139	1367	18	1367	26	1375	20	0.994182	1375	20
MDZ9-63	210	136	2.747	0.108878	0.2266	0.00817184	0.98467	4.41306	0.159148	0.08838	0.00184535	0.510597	1340	25	1316	36	1391	11	0.946082	1391	11
MDZ9-124	153.3	100.8	3.142	0.0692089	0.2482	0.00524703	0.86754	4.02901	0.0851745	0.09097	0.00185866	0.467873	1443	7.2	1429.3	9	1445.9	8	0.988519	1429.3	9
MDZ9-80	79	39.6	3.384	0.0791302	0.2614	0.00571157	0.83185	3.82556	0.083588	0.09436	0.00194978	0.420136	1500.6	9.5	1497	12	1515.3	9.8	0.987923	1515.3	9.8
MDZ9-52	1155	36	3.078	0.0676286	0.2372	0.00527215	0.95058	4.21585	0.093704	0.09467	0.00195086	0.43919	1427.2	7.1	1372	12	1521.5	9.5	0.901742	1521.5	9.5
MDZ9-112	336.5	286.4	3.726	0.0938202	0.2665	0.00621682	0.97609	3.75235	0.0875335	0.1011	0.00206315	0.480234	1577	12	1523	16	1644.4	7.6	0.926174	1523	16
MDZ9-116	176.5	103.1	4.025	0.110708	0.2769	0.00666029	0.95267	3.61141	0.0868655	0.10511	0.00216084	0.366945	1639	15	1576	19	1716.2	8.8	0.918308	1576	19
MDZ9-139	75.6	40.5	4.158	0.100258	0.2955	0.00708083	0.90957	3.38409	0.0810903	0.10157	0.00210195	0.453315	1666	11	1669	19	1653	9.9	1.00968	1669	19
MDZ9-53	130.3	111.9	4.019	0.0957337	0.2858	0.00650251	0.81435	3.49895	0.079608	0.10307	0.00218352	0.553442	1638	11	1620	16	1680	13	0.964286	1680	13
MDZ9-69	85.9	76.8	4.25	0.19906	0.297	0.0142928	0.97398	3.367	0.162033	0.10372	0.00226926	0.29833	1682	36	1677	64	1692	16	0.991135	1692	16
MDZ9-102	139.3	51.91	4.603	0.102913	0.3114	0.00691289	0.89572	3.2113	0.0712889	0.10691	0.00219818	0.401443	1749.7	8.4	1748	15	1747.3	8.8	1.0004	1748	15
MDZ9-9	203.3	90.8	4.406	0.121742	0.3022	0.00790822	0.94084	3.30907	0.0865944	0.10771	0.00230499	-0.12485	1713	16	1702	25	1761	14	0.966496	1761	14
MDZ9-130	224.5	119.2	4.732	0.11314	0.3145	0.00740095	0.9616	3.17965	0.0748249	0.10838	0.00219895	0.513896	1773	11	1763	19	1772.3	6.2	0.994753	1763	19
MDZ9-122	180.7	25.63	4.69	0.144563	0.3176	0.00901709	0.99269	3.14861	0.0893934	0.10645	0.00215291	0.273084	1766	19	1778	31	1739.5	5.4	1.02213	1778	31
MDZ9-23	1090	154.3	4.007	0.101323	0.2664	0.00730668	0.85472	3.75375	0.102956	0.1092	0.00244537	0.31441	1635	13	1522	26	1786	18	0.930887	1786	18
MDZ9-76	420	248.4	4.539	0.105627	0.2964	0.00664388	0.96814	3.37382	0.075625	0.11104	0.00225141	0.438435	1737.9	9.9	1673	15	1816.4	6.1	0.921053	1816.4	6.1
MDZ9-135	89.2	73.3	5.101	0.131518	0.3272	0.00766968	0.93495	3.05624	0.0716392	0.11276	0.00241361	0.436126	1840	16	1825	19	1844	14	0.989696	1825	19
MDZ9-58	81.3	31	5.44	0.147775	0.3483	0.00945966	0.83582	2.87109	0.0779774	0.11447	0.00245995	0.54246	1890	16	1926	30	1871	14	1.0294	1871	14
MDZ9-14	312	169	7.61	0.275799	0.3837	0.00961927	0.90321	2.6062	0.0653369	0.1461	0.00384553	0.476241	2184	28	2093	27	2300	29	0.91	2300	29
MDZ9-61	90.1	150	13.82	0.335406	0.5254	0.0133288	0.97621	1.90331	0.048285	0.1923	0.00402886	0.520949	2737	13	2722	35	2762.2	9.9	0.985446	2762.2	9.9
MDZ9-54	114.3	68.4	15.52	0.344744	0.5527	0.0121322	0.90163	1.8093	0.0397156	0.2051	0.00415963	0.477432	2847.4	9.2	2837	21	2867.2	5.4	0.989467	2867.2	5.4
discarded grains
MDZ9-104	948	230.9	0.2462	0.00745693	0.03387	0.000995877	0.91514	29.5247	0.868111	0.05233	0.00112404	0.319995	223.4	4.6	214.7	4.6	299	18	0.961056
MDZ9-99	110.9	130	0.286	0.0151234	0.0348	0.0033726	0.60257	28.7356	2.78488	0.0605	0.00360889	0.676712	255	11	220	21	610	120	0.862745
MDZ9-36	170.1	280	0.3239	0.0116642	0.04009	0.00121284	0.21037	24.9439	0.754626	0.0586	0.0023181	0.278343	284.8	7.4	253.4	5.6	547	73	0.889747
MDZ9-15	516	236	1.01	0.320637	0.086	0.0200738	0.99976	11.6279	2.71415	0.0806	0.00855328	0.617224	670	160	530	120	1170	220	0.791045
MDZ9-40	415	82.6	1.375	0.0883869	0.1231	0.00676398	0.99796	8.12348	0.446361	0.08115	0.00176752	0.314191	876	36	748	36	1225	17	0.853881
MDZ9-132	307.4	186.6	2.077	0.0583658	0.1579	0.00409059	0.98689	6.33312	0.164067	0.09495	0.00194707	0.569972	1141	14	945	15	1527	8.5	0.828221
MDZ9-123	631	74	2.302	0.105568	0.1734	0.00641771	0.99166	5.76701	0.213443	0.0955	0.00231043	0.517848	1212	30	1031	30	1538	25	0.85066
MDZ9-100	807	220.4	2.75	0.114127	0.1918	0.00754751	0.99684	5.21376	0.205166	0.10346	0.00211139	0.266207	1340	27	1131	35	1687	7.5	0.84403
MDZ9-21	778	248	3.647	0.0997208	0.1999	0.00456333	0.95294	5.0025	0.114197	0.13182	0.00271297	0.450697	1560	15	1175	12	2122.3	8.5	0.753205
MDZ9-95	171	61.4	2.186	0.053023	0.2068	0.00473249	0.98826	4.83559	0.11066	0.07612	0.0015412	0.479912	1176.6	9.6	1212	13	1098.2	6.4	1.10362
MDZ9-91	760	59.9	3.04	0.115328	0.2097	0.00691662	0.99133	4.76872	0.157289	0.10451	0.00216135	0.419451	1417	25	1227	30	1705.5	9.7	0.719437
MDZ9-120	111.7	89.3	3.182	0.082183	0.2328	0.00607358	0.96536	4.29553	0.112067	0.09842	0.00202373	0.422002	1453	13	1349	21	1594.3	9	0.846139
MDZ9-33	78.5	13.7	2.62	0.177893	0.239	0.012917	0.97464	4.1841	0.226134	0.0796	0.00180002	0.575648	1304	49	1380	65	1187	21	1.16259
MDZ9-20	749	365	4.06	0.161844	0.2685	0.0076868	0.93389	3.72439	0.106625	0.1101	0.00304283	-0.66891	1644	29	1533	28	1799	35	0.85214
MDZ9-106	176.8	110.2	3.34	0.0716815	0.2689	0.00581058	0.94829	3.71886	0.0803597	0.08964	0.00183263	0.517912	1490.4	6	1535	11	1417.8	8.1	1.08266
MDZ9-18	798	84.6	5.7	0.180544	0.3053	0.00899129	0.92786	3.27547	0.0964647	0.1364	0.00306627	0.00020241	1931	21	1717	33	2181	18	0.787254
MDZ9-108	260	266.8	6.293	0.14807	0.3389	0.00781993	0.96216	2.95072	0.0680863	0.13397	0.0027186	0.415923	2017	11	1881	19	2150.6	5.9	0.87464
MDZ9-65	160.3	28.6	4.989	0.119633	0.3584	0.00806661	0.9433	2.79018	0.0627994	0.10113	0.00208349	0.417067	1817	11	1975	17	1644.8	9.1	1.20075
